# Supplementary material for: Tephrostratigraphy and tephrochronology of lakes Ohrid and Prespa, Balkans
Source: Copernicus journal article supplement (doi:10.5194/bg-7-3273-2010), 2010-10-22
Supplement: Supplementary file 1 [file bg-7-3273-2010-supplement.zip]

Foglio1

PT0916-1

|              | 1     | 2     | 3     | 4     | 5     | 6     | mean  | sd   |
|--------------|-------|-------|-------|-------|-------|-------|-------|------|
| SiO2         | 49.87 | 51.27 | 49.5  | 50.9  | 49.93 | 49.83 | 50.22 | 0.7  |
| TiO2         | 1.27  | 1.03  | 1.23  | 0.92  | 1.13  | 0.96  | 1.09  | 0.14 |
| Al2O3        | 18.67 | 19.35 | 18.57 | 19.17 | 18.87 | 19.65 | 19.05 | 0.42 |
| FeOtot       | 8.25  | 7.34  | 8.78  | 8.26  | 8.27  | 7.84  | 8.12  | 0.49 |
| MnO          | 0.2   | 0.21  | 0.16  | 0     | 0.17  | 0.27  | 0.17  | 0.09 |
| MgO          | 3.91  | 3.25  | 3.92  | 3.28  | 4     | 3.71  | 3.68  | 0.33 |
| CaO          | 9.13  | 8.8   | 9.66  | 8.43  | 9.89  | 10.44 | 9.39  | 0.74 |
| Na2O         | 2.85  | 3.26  | 2.77  | 3.24  | 2.83  | 2.52  | 2.91  | 0.29 |
| K2O          | 5.12  | 4.99  | 4.93  | 5.3   | 4.18  | 4.14  | 4.78  | 0.49 |
| P2O5         | 0.5   | 0.24  | 0.28  | 0.24  | 0.42  | 0.28  | 0.33  | 0.11 |
| ClO          | 0.23  | 0.26  | 0.19  | 0.25  | 0.3   | 0.35  | 0.26  | 0.06 |
|              | 100   | 100   | 99.99 | 99.99 | 99.99 | 99.99 | 99.99 |      |
| total alkali | 7.97  | 8.25  | 7.7   | 8.54  | 7.01  | 6.66  | 7.69  | 0.73 |
| alkali ratio | 1.8   | 1.53  | 1.78  | 1.64  | 1.48  | 1.64  | 1.64  | 0.13 |

|              | 1      | 2     | 3      | 4      | 5      | 6     | mean   | sd   |
|--------------|--------|-------|--------|--------|--------|-------|--------|------|
|              | 59.15  | 58.86 | 59.26  | 59.7   | 58.91  | 59.66 | 59.26  | 0.36 |
| SiO2         | 0.5    | 0.57  | 0.4    | 0.5    | 0.49   | 0.45  | 0.49   | 0.06 |
| TiO2         | 19.93  | 20.24 | 20.44  | 20.38  | 20.07  | 20.19 | 20.21  | 0.19 |
| Al2O3        | 2.83   | 2.99  | 2.64   | 2.7    | 3.04   | 2.6   | 2.8    | 0.18 |
| FeOtot       | 0.21   | 0.19  | 0.17   | 0.19   | 0.11   | 0.15  | 0.17   | 0.04 |
| MnO          | 0.7    | 0.79  | 0.66   | 0.62   | 0.8    | 0.74  | 0.72   | 0.07 |
| MgO          | 2.49   | 2.78  | 2.32   | 2.51   | 2.58   | 2.58  | 2.54   | 0.15 |
| CaO          | 5.29   | 4.92  | 5.17   | 4.74   | 5.02   | 4.62  | 4.96   | 0.25 |
| Na2O         | 8.54   | 8.28  | 8.57   | 8.15   | 8.58   | 8.57  | 8.45   | 0.19 |
| K2O          | 0      | 0     | 0      | 0      | 0      | 0     | 0      | 0    |
| P2O5         | 0.37   | 0.38  | 0.38   | 0.53   | 0.42   | 0.44  | 0.42   | 0.06 |
| ClO          | 100.01 | 100   | 100.01 | 100.02 | 100.02 | 100   | 100.01 |      |
|              | 13.83  | 13.2  | 13.74  | 12.89  | 13.6   | 13.19 | 13.41  | 0.37 |
| total alkali | 1.61   | 1.68  | 1.66   | 1.72   | 1.71   | 1.85  | 1.71   | 0.08 |
| alkali ratio |        |       |        |        |        |       |        |      |
