# Supplementary material for: Tephrostratigraphy and tephrochronology of lakes Ohrid and Prespa, Balkans
Source: Copernicus journal article supplement (doi:10.5194/bg-7-3273-2010), 2010-10-22
Supplement: Supplementary file 2 [file bg-7-3273-2010-supplement.zip]

| OT0700-1                       | 1     | 2      | 3     | 4     | 5     | 6      | 7     | 8     | 9     | 10    | 11     | 12    | mean  | sd    |        |       |       |       |      |        |
|--------------------------------|-------|--------|-------|-------|-------|--------|-------|-------|-------|-------|--------|-------|-------|-------|--------|-------|-------|-------|------|--------|
| SiO <sub>2</sub>               | 60.01 | 60.87  | 62.61 | 61.1  | 61.68 | 62.37  | 62.18 | 62.5  | 61.67 | 60.88 | 61.98  | 61.38 | 61.6  | 0.79  |        |       |       |       |      |        |
| TiO <sub>2</sub>               | 0.59  | 0.36   | 0.3   | 0.51  | 0.47  | 0.34   | 0.4   | 0.33  | 0.4   | 0.25  | 0.26   | 0.32  | 0.38  | 0.1   |        |       |       |       |      |        |
| Al <sub>2</sub> O <sub>3</sub> | 18.85 | 18.75  | 18.41 | 18.85 | 18.84 | 18.67  | 18.5  | 18.63 | 18.94 | 18.72 | 18.87  | 18.85 | 18.74 | 0.16  |        |       |       |       |      |        |
| FeO                            | 3.8   | 3.1    | 2.76  | 3.26  | 2.91  | 2.51   | 2.78  | 2.72  | 3.02  | 3.36  | 2.87   | 3.26  | 3.03  | 0.35  |        |       |       |       |      |        |
| MnO                            | 0.24  | 0.13   | 0.14  | 0.08  | 0.13  | 0      | 0.26  | 0.06  | 0     | 0     | 0      | 0.13  | 0.1   | 0.09  |        |       |       |       |      |        |
| MgO                            | 0.9   | 0.69   | 0.58  | 0.81  | 0.65  | 0.49   | 0.47  | 0.49  | 0.68  | 0.93  | 0.53   | 0.83  | 0.67  | 0.16  |        |       |       |       |      |        |
| CaO                            | 2.93  | 2.49   | 1.96  | 2.4   | 2.1   | 2.08   | 2.07  | 1.9   | 2.46  | 2.72  | 2.16   | 2.28  | 2.3   | 0.31  |        |       |       |       |      |        |
| Na <sub>2</sub> O              | 3.28  | 3.5    | 4     | 3.38  | 3.84  | 4.44   | 4.31  | 4.19  | 3.07  | 3.2   | 3.94   | 3.74  | 3.74  | 0.45  |        |       |       |       |      |        |
| K <sub>2</sub> O               | 9.11  | 9.7    | 8.59  | 9.2   | 8.84  | 8.59   | 8.42  | 8.37  | 9.33  | 9.6   | 8.9    | 8.66  | 8.94  | 0.45  |        |       |       |       |      |        |
| P <sub>2</sub> O <sub>5</sub>  | 0     | 0      | 0     | 0     | 0     | 0      | 0     | 0     | 0     | 0     | 0      | 0     | 0     | 0     |        |       |       |       |      |        |
| ClO                            | 0.29  | 0.41   | 0.65  | 0.41  | 0.54  | 0.51   | 0.6   | 0.8   | 0.43  | 0.34  | 0.48   | 0.55  | 0.5   | 0.14  |        |       |       |       |      |        |
|                                | 100   | 100    | 100   | 100   | 100   | 100    | 99.99 | 99.99 | 100   | 100   | 99.99  | 100   | 100   |       |        |       |       |       |      |        |
| total alkali                   | 12.39 | 13.2   | 12.59 | 12.58 | 12.68 | 13.03  | 12.73 | 12.56 | 12.4  | 12.8  | 12.84  | 12.4  | 12.68 | 0.25  |        |       |       |       |      |        |
| alkali ratio                   | 2.78  | 2.77   | 2.15  | 2.72  | 2.3   | 1.93   | 1.95  | 2     | 3.04  | 3     | 2.26   | 2.32  | 2.43  | 0.41  |        |       |       |       |      |        |
| OT0700-2                       | 1     | 2      | 3     | 4     | 5     | 6      | 7     | 8     | 9     | 10    | 11     | mean  | sd    | 1     | 2      | 3     | 4     | mean  | sd   | 16     |
| SiO <sub>2</sub>               | 60.59 | 60.5   | 60.57 | 60.59 | 60.59 | 60.82  | 60.68 | 61.19 | 61.36 | 60.96 | 60.99  | 60.8  | 0.29  | 61.23 | 61.03  | 61.37 | 61.06 | 61.17 | 0.16 | 59.85  |
| TiO <sub>2</sub>               | 0.34  | 0.36   | 0.41  | 0.35  | 0.28  | 0.51   | 0.4   | 0.2   | 0.4   | 0.36  | 0.43   | 0.37  | 0.08  | 0.5   | 0.37   | 0.29  | 0.58  | 0.44  | 0.13 | 0.45   |
| Al <sub>2</sub> O <sub>3</sub> | 19.2  | 19.29  | 19.14 | 19.33 | 19.15 | 19.18  | 19.37 | 19.33 | 18.93 | 19.38 | 19.11  | 19.22 | 0.14  | 19.14 | 19.33  | 19.34 | 19.45 | 19.32 | 0.13 | 18.73  |
| FeO                            | 3.03  | 2.97   | 2.89  | 2.98  | 2.97  | 2.84   | 2.86  | 2.85  | 2.99  | 3.07  | 3.07   | 2.96  | 0.08  | 2.87  | 2.99   | 2.86  | 2.82  | 2.89  | 0.07 | 3.64   |
| MnO                            | 0.25  | 0.14   | 0.21  | 0.15  | 0.17  | 0.26   | 0.2   | 0.05  | 0.17  | 0.13  | 0.23   | 0.18  | 0.06  | 0.26  | 0.32   | 0.26  | 0.34  | 0.3   | 0.04 | 0.12   |
| MgO                            | 0.31  | 0.47   | 0.5   | 0.44  | 0.36  | 0.33   | 0.44  | 0.36  | 0.31  | 0.43  | 0.33   | 0.39  | 0.07  | 0.4   | 0.46   | 0.39  | 0.34  | 0.4   | 0.05 | 0.84   |
| CaO                            | 1.58  | 1.8    | 1.64  | 1.62  | 1.78  | 1.75   | 1.74  | 1.66  | 1.83  | 1.64  | 1.64   | 1.7   | 0.08  | 1.73  | 1.83   | 1.69  | 1.67  | 1.73  | 0.07 | 2.71   |
| Na <sub>2</sub> O              | 6.66  | 6.46   | 6.72  | 6.55  | 6.6   | 6.38   | 6.45  | 6.32  | 6.17  | 6.35  | 6.2    | 6.44  | 0.18  | 5.69  | 5.65   | 5.78  | 5.85  | 5.74  | 0.09 | 3.18   |
| K <sub>2</sub> O               | 7.32  | 7.27   | 7.22  | 7.41  | 7.28  | 7.26   | 7.11  | 7.33  | 7.1   | 7.12  | 7.26   | 7.24  | 0.1   | 7.53  | 7.33   | 7.32  | 7.15  | 7.33  | 0.16 | 10.19  |
| P <sub>2</sub> O <sub>5</sub>  | 0     | 0      | 0     | 0     | 0     | 0      | 0     | 0     | 0     | 0     | 0      | 0     | 0     | 0     | 0      | 0     | 0     | 0     | 0    | 0      |
| ClO                            | 0.72  | 0.75   | 0.7   | 0.57  | 0.8   | 0.7    | 0.75  | 0.71  | 0.73  | 0.56  | 0.75   | 0.7   | 0.07  | 0.65  | 0.7    | 0.7   | 0.72  | 0.69  | 0.03 | 0.3    |
|                                | 100   | 100.01 | 100   | 99.99 | 99.98 | 100.03 | 100   | 100   | 99.99 | 100   | 100.01 | 100   |       | 100   | 100.01 | 100   | 99.98 | 100   |      | 100.01 |
| total alkali                   | 13.98 | 13.73  | 13.94 | 13.96 | 13.88 | 13.64  | 13.56 | 13.65 | 13.27 | 13.47 | 13.46  | 13.69 | 0.24  | 13.22 | 12.98  | 13.1  | 13    | 13.08 | 0.11 | 13.37  |
| alkali ratio                   | 1.1   | 1.13   | 1.07  | 1.13  | 1.1   | 1.14   | 1.1   | 1.16  | 1.15  | 1.12  | 1.17   | 1.13  | 0.03  | 1.32  | 1.3    | 1.27  | 1.22  | 1.28  | 0.04 | 3.2    |
