# Supplementary material for: Tephrostratigraphy and tephrochronology of lakes Ohrid and Prespa, Balkans
Source: Copernicus journal article supplement (doi:10.5194/bg-7-3273-2010), 2010-10-22
Supplement: Supplementary file 3 [file bg-7-3273-2010-supplement.zip]

| Sample   | depth<br>(cm) | Shard | SiO <sub>2</sub> | TiO <sub>2</sub> | Al <sub>2</sub> O <sub>3</sub> | FeO <sub>tot</sub> | MnO         | MgO         | CaO         | Na <sub>2</sub> O | K <sub>2</sub> O | P <sub>2</sub> O <sub>5</sub> | ClO         | Total  | Total<br>alk | Alk.<br>Ratio |
|----------|---------------|-------|------------------|------------------|--------------------------------|--------------------|-------------|-------------|-------------|-------------------|------------------|-------------------------------|-------------|--------|--------------|---------------|
| OT0702-1 | 74.5-<br>77.5 | 1     | 47.15            | 1.06             | 18.95                          | 7.62               | 0.34        | 2.08        | 11.16       | 6.34              | 4.35             | 0.04                          | 0.92        | 100.01 | 10.69        | 0.69          |
|          |               | 2     | 48.32            | 0.75             | 20.29                          | 7.56               | 0.13        | 1.49        | 8.45        | 5.64              | 6.24             | 0.09                          | 1.04        | 100    | 11.88        | 1.11          |
|          |               | 3     | 48.28            | 0.95             | 21                             | 7.07               | 0.33        | 1.39        | 7.81        | 5.68              | 6.39             | 0                             | 1.09        | 99.99  | 12.07        | 1.13          |
|          |               | 4     | 48.82            | 0.83             | 20.75                          | 7.33               | 0.22        | 1.24        | 7.64        | 6.07              | 5.99             | 0.09                          | 1.03        | 100.01 | 12.06        | 0.99          |
|          |               | 5     | 48.61            | 1.02             | 20.79                          | 7.28               | 0.4         | 1.35        | 7.72        | 6.4               | 5.29             | 0                             | 1.15        | 100.01 | 11.69        | 0.83          |
|          |               | 6     | 50.33            | 0.88             | 20.59                          | 6.72               | 0.31        | 1.01        | 7.12        | 5.88              | 5.86             | 0.09                          | 1.21        | 100    | 11.74        | 1.00          |
|          |               | 7     | 50.21            | 0.67             | 21.69                          | 5.96               | 0.17        | 1.19        | 6.41        | 7.32              | 5.13             | 0.09                          | 1.14        | 99.98  | 12.45        | 0.70          |
|          |               | mean  | <b>48.82</b>     | <b>0.88</b>      | <b>20.58</b>                   | <b>7.08</b>        | <b>0.27</b> | <b>1.39</b> | <b>8.04</b> | <b>6.19</b>       | <b>5.61</b>      | <b>0.06</b>                   | <b>1.08</b> | -      | -            | -             |
|          |               | sd    | <b>1.12</b>      | <b>0.14</b>      | <b>0.84</b>                    | <b>0.58</b>        | <b>0.10</b> | <b>0.34</b> | <b>1.51</b> | <b>0.58</b>       | <b>0.72</b>      | <b>0.04</b>                   | <b>0.10</b> | -      | -            | -             |
|          |               |       |                  |                  |                                |                    |             |             |             |                   |                  |                               |             |        |              |               |
| OT0702-2 | 145.5-<br>144 | 1     | 58.08            | 1.54             | 17.42                          | 6.33               | 0.16        | 2.09        | 4.70        | 5.47              | 3.31             | 0.54                          | 0.35        | 99.99  | 8.78         | 0.61          |
|          |               | 2     | 54.02            | 1.72             | 17.06                          | 8.84               | 0.44        | 3.15        | 5.46        | 5.16              | 3.46             | 0.32                          | 0.37        | 100.00 | 8.62         | 0.67          |
|          |               | 3     | 56.01            | 1.80             | 18.89                          | 5.28               | 0.12        | 1.65        | 6.25        | 6.58              | 2.85             | 0.36                          | 0.21        | 100.00 | 9.43         | 0.43          |
|          |               | 4     | 56.26            | 1.55             | 18.28                          | 6.61               | 0.29        | 1.78        | 4.53        | 5.96              | 3.93             | 0.43                          | 0.38        | 100.00 | 9.89         | 0.66          |
|          |               | 5     | 55.13            | 1.74             | 17.20                          | 8.10               | 0.13        | 2.40        | 5.61        | 5.42              | 3.44             | 0.50                          | 0.32        | 99.99  | 8.86         | 0.63          |
|          |               | 6     | 59.53            | 1.47             | 18.21                          | 3.94               | 0.17        | 0.89        | 4.17        | 6.11              | 5.05             | 0.23                          | 0.20        | 99.97  | 11.16        | 0.83          |
|          |               | 7     | 53.15            | 1.99             | 17.27                          | 8.81               | 0.35        | 2.80        | 5.87        | 5.32              | 3.60             | 0.53                          | 0.31        | 100.00 | 8.92         | 0.68          |
|          |               | 8     | 56.31            | 1.04             | 21.28                          | 3.86               | 0.14        | 0.92        | 7.32        | 6.05              | 2.67             | 0.27                          | 0.13        | 99.99  | 8.72         | 0.44          |
|          |               | 9     | 56.87            | 1.58             | 18.59                          | 5.45               | 0.00        | 1.32        | 4.67        | 6.42              | 4.33             | 0.37                          | 0.41        | 100.01 | 10.75        | 0.67          |
|          |               | 10    | 54.41            | 1.80             | 17.61                          | 8.02               | 0.25        | 2.40        | 4.93        | 6.10              | 3.70             | 0.47                          | 0.31        | 100.00 | 9.80         | 0.61          |
|          |               | mean  | <b>55.98</b>     | <b>1.62</b>      | <b>18.18</b>                   | <b>6.52</b>        | <b>0.21</b> | <b>1.94</b> | <b>5.35</b> | <b>5.86</b>       | <b>3.63</b>      | <b>0.40</b>                   | <b>0.30</b> | -      | -            | -             |
|          |               | sd    | <b>1.92</b>      | <b>0.26</b>      | <b>1.26</b>                    | <b>1.88</b>        | <b>0.13</b> | <b>0.77</b> | <b>0.95</b> | <b>0.49</b>       | <b>0.69</b>      | <b>0.11</b>                   | <b>0.09</b> | -      | -            | -             |
|          |               |       |                  |                  |                                |                    |             |             |             |                   |                  |                               |             |        |              |               |
| OT0702-3 | 269-<br>277.5 | 1     | 58.94            | 0.30             | 21.45                          | 1.89               | 0.21        | 0.04        | 1.86        | 7.84              | 6.98             | 0                             | 0.50        | 100.01 | 14.82        | 0.89          |
|          |               | 2     | 58.79            | 0.00             | 21.50                          | 2.02               | 0.00        | 0.10        | 1.93        | 7.65              | 7.52             | 0                             | 0.49        | 100.00 | 15.17        | 0.98          |
|          |               | 3     | 58.96            | 0.13             | 21.47                          | 1.83               | 0.19        | 0.29        | 1.84        | 7.43              | 7.29             | 0                             | 0.57        | 100.00 | 14.72        | 0.98          |
|          |               | 4     | 60.50            | 0.24             | 21.77                          | 2.00               | 0.22        | 0.25        | 1.66        | 6.13              | 6.70             | 0                             | 0.53        | 100.00 | 12.83        | 1.09          |
|          |               | 5     | 58.98            | 0.23             | 21.65                          | 1.95               | 0.21        | 0.08        | 1.50        | 7.87              | 7.06             | 0                             | 0.47        | 100.00 | 14.93        | 0.90          |
|          |               | 6     | 58.82            | 0.19             | 21.69                          | 1.83               | 0.17        | 0.07        | 1.78        | 7.70              | 7.17             | 0                             | 0.57        | 99.99  | 14.87        | 0.93          |
|          |               | 7     | 59.18            | 0.11             | 21.56                          | 2.14               | 0.17        | 0.17        | 1.79        | 7.58              | 6.76             | 0                             | 0.53        | 99.99  | 14.34        | 0.89          |
|          |               | 8     | 58.68            | 0.17             | 21.42                          | 2.08               | 0.15        | 0.16        | 1.82        | 8.04              | 6.97             | 0                             | 0.51        | 100.00 | 15.01        | 0.87          |
|          |               | 9     | 59.08            | 0.20             | 21.72                          | 1.85               | 0.21        | 0.27        | 1.63        | 7.76              | 6.76             | 0                             | 0.51        | 99.99  | 14.52        | 0.87          |
|          |               | mean  | <b>59.10</b>     | <b>0.17</b>      | <b>21.58</b>                   | <b>1.95</b>        | <b>0.17</b> | <b>0.16</b> | <b>1.76</b> | <b>7.56</b>       | <b>7.02</b>      | <b>0</b>                      | <b>0.52</b> | -      | -            | -             |
|          |               | sd    | <b>0.55</b>      | <b>0.09</b>      | <b>0.13</b>                    | <b>0.11</b>        | <b>0.07</b> | <b>0.09</b> | <b>0.13</b> | <b>0.56</b>       | <b>0.27</b>      | <b>0</b>                      | <b>0.03</b> | -      | -            | -             |
|          |               |       |                  |                  |                                |                    |             |             |             |                   |                  |                               |             |        |              |               |
| OT0702-4 | 617-620       | 1     | 61.39            | 0.45             | 18.65                          | 3.12               | 0.09        | 0.71        | 2.31        | 3.61              | 9.26             | 0                             | 0.42        | 100.01 | 12.87        | 2.57          |
|          |               | 2     | 60.6             | 0.42             | 18.7                           | 3.29               | 0.16        | 0.91        | 2.67        | 3.26              | 9.65             | 0                             | 0.33        | 99.99  | 12.91        | 2.96          |
|          |               | 3     | 61.49            | 0.45             | 18.64                          | 3.07               | 0.26        | 0.64        | 2.21        | 3.7               | 9.11             | 0                             | 0.41        | 99.98  | 12.81        | 2.46          |
|          |               | 4     | 60.37            | 0.46             | 18.72                          | 3.45               | 0           | 0.89        | 2.7         | 3.27              | 9.72             | 0                             | 0.41        | 99.99  | 12.99        | 2.97          |
|          |               | 5     | 61.26            | 0.41             | 18.88                          | 3.07               | 0.08        | 0.68        | 2.18        | 3.55              | 9.45             | 0                             | 0.44        | 100    | 13           | 2.66          |
|          |               | 6     | 60.31            | 0.37             | 18.8                           | 3.45               | 0.08        | 0.92        | 2.68        | 3.07              | 10.04            | 0                             | 0.28        | 100    | 13.11        | 3.27          |
|          |               | 7     | 60.72            | 0.39             | 18.92                          | 3.21               | 0.05        | 0.7         | 2.64        | 3.32              | 9.64             | 0                             | 0.4         | 99.99  | 12.96        | 2.90          |
|          |               | 8     | 62.11            | 0.34             | 18.61                          | 2.85               | 0.11        | 0.5         | 2.15        | 4.07              | 8.77             | 0                             | 0.49        | 100    | 12.84        | 2.15          |
|          |               | 9     | 61.92            | 0.28             | 18.58                          | 2.83               | 0.12        | 0.53        | 2.17        | 4.28              | 8.74             | 0                             | 0.56        | 100.01 | 13.02        | 2.04          |
|          |               | 10    | 61.75            | 0.34             | 18.67                          | 2.93               | 0.07        | 0.48        | 2.23        | 4.4               | 8.54             | 0                             | 0.6         | 100.01 | 12.94        | 1.94          |
|          |               | 11    | 61.24            | 0.35             | 18.74                          | 3.02               | 0.15        | 0.67        | 2.1         | 4.23              | 8.98             | 0                             | 0.53        | 100.01 | 13.21        | 2.12          |
|          |               | 12    | 62.02            | 0.43             | 18.5                           | 2.98               | 0.16        | 0.36        | 2.13        | 4.05              | 8.77             | 0                             | 0.61        | 100.01 | 12.82        | 2.17          |
|          |               | mean  | <b>61.27</b>     | <b>0.39</b>      | <b>18.70</b>                   | <b>3.11</b>        | <b>0.11</b> | <b>0.67</b> | <b>2.35</b> | <b>3.73</b>       | <b>9.22</b>      | <b>0</b>                      | <b>0.46</b> | -      | -            | -             |
|          |               | sd    | <b>0.64</b>      | <b>0.06</b>      | <b>0.12</b>                    | <b>0.21</b>        | <b>0.07</b> | <b>0.18</b> | <b>0.25</b> | <b>0.46</b>       | <b>0.48</b>      | <b>0</b>                      | <b>0.10</b> | -      | -            | -             |
|          |               |       |                  |                  |                                |                    |             |             |             |                   |                  |                               |             |        |              |               |
| OT0702-5 | 689-696       | 1     | 57.76            | 0.99             | 21.99                          | 2.64               | 0.17        | 0.51        | 5.06        | 3.07              | 7.62             | 0                             | 0.20        | 100.01 | 10.69        | 2.48          |
|          |               | 2     | 57.79            | 0.87             | 19.81                          | 4.26               | 0.15        | 0.48        | 5.24        | 4.18              | 6.85             | 0                             | 0.37        | 100.00 | 11.03        | 1.64          |
|          |               | 3     | 57.55            | 0.66             | 19.84                          | 4.08               | 0.06        | 0.80        | 4.41        | 3.78              | 8.37             | 0                             | 0.44        | 99.99  | 12.15        | 2.21          |
|          |               | 4     | 57.06            | 0.62             | 20.52                          | 3.82               | 0.28        | 0.63        | 5.91        | 3.28              | 7.49             | 0                             | 0.40        | 100.01 | 10.77        | 2.28          |
|          |               | mean  | <b>57.54</b>     | <b>0.79</b>      | <b>20.54</b>                   | <b>3.70</b>        | <b>0.17</b> | <b>0.61</b> | <b>5.16</b> | <b>3.58</b>       | <b>7.58</b>      | <b>0</b>                      | <b>0.35</b> | -      | -            | -             |
|          |               | sd    | <b>0.34</b>      | <b>0.18</b>      | <b>1.02</b>                    | <b>0.73</b>        | <b>0.09</b> | <b>0.15</b> | <b>0.62</b> | <b>0.50</b>       | <b>0.62</b>      | <b>0</b>                      | <b>0.11</b> | -      | -            | -             |
|          |               |       |                  |                  |                                |                    |             |             |             |                   |                  |                               |             |        |              |               |
| OT0702-6 | 743-752       | 1     | 60.67            | 0.43             | 19.02                          | 2.98               | 0.13        | 0.42        | 1.8         | 6.45              | 7.4              | 0                             | 0.69        | 99.99  | 13.85        | 1.15          |
|          |               | 2     | 60.48            | 0.36             | 19.18                          | 2.96               | 0.21        | 0.46        | 1.88        | 6.43              | 7.37             | 0                             | 0.68        | 100.01 | 13.8         | 1.15          |
|          |               | 3     | 61.12            | 0.38             | 19.2                           | 2.86               | 0.13        | 0.4         | 1.58        | 6.36              | 7.3              | 0                             | 0.67        | 100    | 13.66        | 1.15          |
|          |               | 4     | 61.1             | 0.48             | 18.86                          | 2.76               | 0.26        | 0.46        | 1.79        | 5.91              | 7.81             | 0                             | 0.57        | 100    | 13.72        | 1.32          |
|          |               | 5     | 60.69            | 0.29             | 19.06                          | 2.84               | 0.1         | 0.48        | 1.82        | 6.66              | 7.32             | 0                             | 0.73        | 99.99  | 13.98        | 1.10          |
|          |               | 6     | 60.89            | 0.46             | 19.1                           | 2.99               | 0.25        | 0.46        | 1.56        | 6.62              | 7.05             | 0                             | 0.62        | 100    | 13.67        | 1.06          |
|          |               | 7     | 61.01            | 0.45             | 19.2                           | 3.08               | 0.26        | 0.38        | 1.65        | 6.22              | 7.14             | 0                             | 0.63        | 100.02 | 13.36        | 1.15          |
|          |               | 8     | 61.43            | 0.14             | 19.16                          | 3.02               | 0           | 0.69        | 2.3         | 5.08              | 7.81             | 0                             | 0.37        | 100    | 12.89        | 1.54          |
|          |               | 9     | 60.41            | 0.55             | 19.2                           | 3                  | 0.36        | 0.5         | 1.72        | 6.44              | 7.07             | 0                             | 0.75        | 100    | 13.51        | 1.10          |
|          |               | 10    | 60.65            | 0.42             | 19.24                          | 3.06               | 0.15        | 0.57        | 1.6         | 6.45              | 7.16             | 0                             | 0.7         | 100    | 13.61        | 1.11          |
|          |               | 11    | 60.63            | 0.39             | 19.24                          | 2.66               | 0.17        | 0.41        | 1.72        | 6.74              | 7.32             | 0                             | 0.73        | 100.01 | 14.06        | 1.09          |

|           |             |              |              |             |              |             |             |             |             |             |             |             |             |        |       |      |
|-----------|-------------|--------------|--------------|-------------|--------------|-------------|-------------|-------------|-------------|-------------|-------------|-------------|-------------|--------|-------|------|
|           |             | 12           | 60.57        | 0.42        | 19.21        | 3.03        | 0.31        | 0.45        | 1.67        | 6.53        | 7.07        | 0           | 0.73        | 99.99  | 13.6  | 1.08 |
|           |             | <i>mean</i>  | <b>60.80</b> | <b>0.40</b> | <b>19.14</b> | <b>2.94</b> | <b>0.19</b> | <b>0.47</b> | <b>1.76</b> | <b>6.32</b> | <b>7.32</b> | <b>0</b>    | <b>0.66</b> | -      | -     | -    |
|           |             | <i>sd</i>    | <b>0.31</b>  | <b>0.10</b> | <b>0.11</b>  | <b>0.13</b> | <b>0.10</b> | <b>0.08</b> | <b>0.20</b> | <b>0.45</b> | <b>0.26</b> | <b>0</b>    | <b>0.10</b> | -      | -     | -    |
| OT0702-7  | 822-825     | 1            | 71.88        | 0.33        | 8.26         | 7.97        | 0.16        | 0           | 0.29        | 5.99        | 4.2         | 0           | 0.92        | 100    | 10.19 | 0.70 |
|           |             | 2            | 71.75        | 0.51        | 8.15         | 8.1         | 0.41        | 0           | 0.38        | 5.54        | 4.23        | 0           | 0.93        | 100    | 9.77  | 0.76 |
|           |             | 3            | 71.57        | 0.45        | 8.3          | 8.12        | 0.33        | 0.12        | 0.28        | 5.46        | 4.48        | 0           | 0.9         | 100.01 | 9.94  | 0.82 |
|           |             | 4            | 72.06        | 0.6         | 8.28         | 8.02        | 0.46        | 0.06        | 0.36        | 4.92        | 4.31        | 0           | 0.92        | 99.99  | 9.23  | 0.88 |
|           |             | 5            | 72.61        | 0.58        | 8.45         | 8.29        | 0.34        | 0.2         | 0.35        | 3.88        | 4.45        | 0           | 0.84        | 99.99  | 8.33  | 1.15 |
|           |             | 6            | 71.13        | 0.51        | 8.07         | 8.15        | 0.39        | 0.12        | 0.35        | 6.04        | 4.26        | 0           | 0.98        | 100    | 10.3  | 0.71 |
|           |             | 7            | 71.55        | 0.32        | 8.18         | 8           | 0.23        | 0.17        | 0.3         | 5.82        | 4.47        | 0           | 0.96        | 100    | 10.29 | 0.77 |
|           |             | 8            | 72.44        | 0.44        | 8.36         | 7.86        | 0.31        | 0           | 0.29        | 5.05        | 4.4         | 0           | 0.83        | 99.98  | 9.45  | 0.87 |
|           |             | 9            | 71.56        | 0.32        | 8.3          | 8.05        | 0.34        | 0.14        | 0.42        | 5.57        | 4.36        | 0           | 0.95        | 100.01 | 9.93  | 0.78 |
|           |             | 10           | 72.31        | 0.48        | 8.76         | 8.1         | 0.38        | 0.08        | 0.34        | 4.15        | 4.48        | 0           | 0.92        | 100    | 8.63  | 1.08 |
|           |             | 11           | 69.23        | 0.56        | 10.59        | 7.95        | 0.29        | 0.18        | 0.57        | 5.38        | 4.71        | 0           | 0.54        | 100    | 10.09 | 0.88 |
|           |             | 12           | 66.84        | 0.61        | 12.15        | 7.56        | 0.41        | 0.35        | 0.85        | 6.06        | 4.66        | 0           | 0.5         | 99.99  | 10.72 | 0.77 |
|           |             | <i>mean1</i> | <b>71.89</b> | <b>0.45</b> | <b>8.31</b>  | <b>8.07</b> | <b>0.34</b> | <b>0.09</b> | <b>0.34</b> | <b>5.24</b> | <b>4.36</b> | <b>0</b>    | <b>0.92</b> | -      | -     | -    |
|           |             | <i>sd1</i>   | <b>0.47</b>  | <b>0.10</b> | <b>0.19</b>  | <b>0.12</b> | <b>0.09</b> | <b>0.07</b> | <b>0.05</b> | <b>0.74</b> | <b>0.11</b> | <b>0</b>    | <b>0.05</b> | -      | -     | -    |
|           |             | <i>mean2</i> | <b>68.04</b> | <b>0.59</b> | <b>11.37</b> | <b>7.76</b> | <b>0.35</b> | <b>0.27</b> | <b>0.71</b> | <b>5.72</b> | <b>4.69</b> | <b>0</b>    | <b>0.52</b> | -      | -     | -    |
|           |             | <i>sd2</i>   | <b>1.64</b>  | <b>0.11</b> | <b>1.25</b>  | <b>0.18</b> | <b>0.08</b> | <b>0.10</b> | <b>0.16</b> | <b>0.71</b> | <b>0.16</b> | <b>0</b>    | <b>0.16</b> | -      | -     | -    |
| OT0702-8  | 1140-1146.5 | 1            | 57.51        | 0.61        | 19.39        | 4.57        | 0.15        | 1.26        | 3.74        | 4.19        | 8.21        | 0           | 0.37        | 100    | 12.4  | 1.96 |
|           |             | 2            | 57.18        | 0.63        | 19.39        | 4.76        | 0.25        | 1.28        | 4.07        | 4.06        | 7.91        | 0           | 0.47        | 100    | 11.97 | 1.95 |
|           |             | 3            | 57.09        | 0.58        | 19.61        | 4.88        | 0.1         | 1.3         | 4.36        | 4.05        | 7.41        | 0.09        | 0.53        | 100    | 11.46 | 1.83 |
|           |             | 4            | 58.27        | 0.52        | 19.32        | 4.11        | 0.19        | 1.01        | 3.43        | 3.92        | 8.83        | 0           | 0.39        | 99.99  | 12.75 | 2.25 |
|           |             | 5            | 57.83        | 0.48        | 19.39        | 4.52        | 0.1         | 1.09        | 3.82        | 4.44        | 7.84        | 0           | 0.48        | 99.99  | 12.28 | 1.77 |
|           |             | 6            | 57.69        | 0.43        | 19.48        | 4.39        | 0.16        | 1.25        | 4           | 4.31        | 7.82        | 0           | 0.47        | 100    | 12.13 | 1.81 |
|           |             | 7            | 57.72        | 0.47        | 19.84        | 4.74        | 0.15        | 1.3         | 3.4         | 3.84        | 8.06        | 0           | 0.48        | 100    | 11.9  | 2.10 |
|           |             | 8            | 58.05        | 0.56        | 19.37        | 4.01        | 0.13        | 1.07        | 3.48        | 4.38        | 8.5         | 0           | 0.45        | 100    | 12.88 | 1.94 |
|           |             | 9            | 57.06        | 0.66        | 19.52        | 4.65        | 0.18        | 1.37        | 3.88        | 4.33        | 7.88        | 0           | 0.45        | 99.98  | 12.21 | 1.82 |
|           |             | 10           | 57.21        | 0.58        | 19.46        | 4.75        | 0.22        | 1.51        | 4.07        | 4.31        | 7.48        | 0           | 0.41        | 100    | 11.79 | 1.74 |
|           |             | 11           | 58.46        | 0.42        | 19.73        | 3.78        | 0           | 0.97        | 3.23        | 4.23        | 8.66        | 0           | 0.52        | 100    | 12.89 | 2.05 |
|           |             | 12           | 57.12        | 0.62        | 19.38        | 4.62        | 0.23        | 1.24        | 3.77        | 4.05        | 8.46        | 0           | 0.52        | 100.01 | 12.51 | 2.09 |
|           |             | <i>mean</i>  | <b>57.60</b> | <b>0.55</b> | <b>19.49</b> | <b>4.48</b> | <b>0.16</b> | <b>1.22</b> | <b>3.77</b> | <b>4.18</b> | <b>8.09</b> | <b>0.01</b> | <b>0.46</b> | -      | -     | -    |
|           |             | <i>sd</i>    | <b>0.48</b>  | <b>0.08</b> | <b>0.16</b>  | <b>0.34</b> | <b>0.07</b> | <b>0.16</b> | <b>0.33</b> | <b>0.19</b> | <b>0.45</b> | <b>0.03</b> | <b>0.05</b> | -      | -     | -    |
| OT0702-9  | 1229-1232.5 | 1            | 61.45        | 0.45        | 18.91        | 3.07        | 0.16        | 0.49        | 1.75        | 5.37        | 7.93        | 0           | 0.42        | 100    | 13.3  | 1.48 |
|           |             | 2            | 61.7         | 0.38        | 18.85        | 2.86        | 0.18        | 0.51        | 1.72        | 5.86        | 7.28        | 0           | 0.66        | 100    | 13.14 | 1.24 |
|           |             | 3            | 61.15        | 0.59        | 18.89        | 3.1         | 0.23        | 0.57        | 1.73        | 5.38        | 7.84        | 0           | 0.51        | 99.99  | 13.22 | 1.46 |
|           |             | 4            | 61.55        | 0.47        | 18.83        | 2.99        | 0.28        | 0.58        | 1.66        | 5.56        | 7.48        | 0           | 0.59        | 99.99  | 13.04 | 1.35 |
|           |             | 5            | 61.3         | 0.47        | 18.81        | 2.87        | 0.22        | 0.48        | 1.67        | 5.97        | 7.61        | 0           | 0.6         | 100    | 13.58 | 1.27 |
|           |             | 6            | 61.35        | 0.45        | 18.52        | 3.11        | 0.39        | 0.38        | 1.73        | 6.05        | 7.48        | 0           | 0.55        | 100.01 | 13.53 | 1.24 |
|           |             | 7            | 60.97        | 0.51        | 19.01        | 2.88        | 0.32        | 0.37        | 1.62        | 6.91        | 6.7         | 0           | 0.71        | 100    | 13.61 | 0.97 |
|           |             | 8            | 61.03        | 0.4         | 18.72        | 3.37        | 0.21        | 0.29        | 1.75        | 6.38        | 7.02        | 0           | 0.84        | 100.01 | 13.4  | 1.10 |
|           |             | 9            | 61.13        | 0.36        | 18.76        | 3.12        | 0.17        | 0.32        | 1.63        | 7.11        | 6.58        | 0           | 0.82        | 100    | 13.69 | 0.93 |
|           |             | 10           | 60.77        | 0.49        | 18.91        | 3.19        | 0.47        | 0.33        | 1.71        | 6.71        | 6.63        | 0           | 0.78        | 99.99  | 13.34 | 0.99 |
|           |             | 11           | 60.83        | 0.56        | 18.98        | 3.16        | 0.33        | 0.34        | 1.55        | 6.94        | 6.43        | 0           | 0.87        | 99.99  | 13.37 | 0.93 |
|           |             | 12           | 60.76        | 0.5         | 18.74        | 3.13        | 0.37        | 0.24        | 1.77        | 6.99        | 6.67        | 0           | 0.84        | 100.01 | 13.66 | 0.95 |
|           |             | 13           | 61.48        | 0.44        | 18.78        | 3.05        | 0.36        | 0.4         | 1.49        | 6.55        | 6.72        | 0           | 0.73        | 100    | 13.27 | 1.03 |
|           |             | 14           | 60.78        | 0.42        | 18.75        | 3.23        | 0.33        | 0.33        | 1.66        | 7.14        | 6.52        | 0           | 0.83        | 99.99  | 13.66 | 0.91 |
|           |             | 15           | 60.96        | 0.39        | 18.84        | 3.15        | 0.34        | 0.29        | 1.69        | 6.88        | 6.57        | 0           | 0.89        | 100    | 13.45 | 0.95 |
|           |             | <i>mean</i>  | <b>61.15</b> | <b>0.46</b> | <b>18.82</b> | <b>3.09</b> | <b>0.29</b> | <b>0.39</b> | <b>1.68</b> | <b>6.39</b> | <b>7.03</b> | <b>0</b>    | <b>0.71</b> | -      | -     | -    |
|           |             | <i>sd</i>    | <b>0.31</b>  | <b>0.07</b> | <b>0.12</b>  | <b>0.14</b> | <b>0.09</b> | <b>0.11</b> | <b>0.08</b> | <b>0.64</b> | <b>0.52</b> | <b>0</b>    | <b>0.15</b> | -      | -     | -    |
| OT0702-10 | 1440-1447   | 1            | 66.08        | 0.51        | 14.15        | 5.88        | 0.43        | 0.19        | 0.91        | 6.55        | 5.11        | 0           | 0.20        | 100.01 | 11.66 | 0.78 |
|           |             | 2            | 67.11        | 0.53        | 14.73        | 6.04        | 0.23        | 0.42        | 0.90        | 5.00        | 4.87        | 0           | 0.18        | 100.01 | 9.87  | 0.97 |
|           |             | 3            | 65.34        | 0.24        | 19.80        | 0.49        | 0.04        | 0.00        | 0.70        | 6.00        | 7.39        | 0           | 0.00        | 100.00 | 13.39 | 1.23 |
|           |             | 4            | 72.19        | 0.44        | 8.61         | 6.77        | 0.30        | 0.10        | 0.40        | 6.01        | 4.46        | 0           | 0.74        | 100.02 | 10.47 | 0.74 |
|           |             | 5            | 71.17        | 0.38        | 11.80        | 5.91        | 0.40        | 0.19        | 0.40        | 4.08        | 5.08        | 0           | 0.59        | 100.00 | 9.16  | 1.25 |
|           |             | 6            | 73.49        | 0.25        | 9.33         | 6.82        | 0.25        | 0.00        | 0.36        | 4.43        | 4.31        | 0           | 0.75        | 99.99  | 8.74  | 0.97 |
|           |             | 7            | 72.95        | 0.48        | 8.80         | 6.75        | 0.36        | 0.14        | 0.22        | 5.40        | 4.24        | 0           | 0.65        | 99.99  | 9.64  | 0.79 |
|           |             | 8            | 72.76        | 0.49        | 8.84         | 6.99        | 0.32        | 0.13        | 0.29        | 5.02        | 4.34        | 0           | 0.82        | 100.00 | 9.36  | 0.86 |
|           |             | 9            | 72.56        | 0.43        | 8.66         | 6.96        | 0.25        | 0.14        | 0.35        | 5.39        | 4.56        | 0           | 0.71        | 100.01 | 9.95  | 0.85 |
|           |             | <i>mean1</i> | <b>66.18</b> | <b>0.43</b> | <b>16.23</b> | <b>4.14</b> | <b>0.23</b> | <b>0.20</b> | <b>0.84</b> | <b>5.85</b> | <b>5.79</b> | <b>0</b>    | <b>0.13</b> | -      | -     | -    |
|           |             | <i>sd1</i>   | <b>0.89</b>  | <b>0.16</b> | <b>3.11</b>  | <b>3.16</b> | <b>0.20</b> | <b>0.21</b> | <b>0.12</b> | <b>0.79</b> | <b>1.39</b> | <b>0</b>    | <b>0.11</b> | -      | -     | -    |
|           |             | <i>mean2</i> | <b>72.52</b> | <b>0.41</b> | <b>9.34</b>  | <b>6.70</b> | <b>0.31</b> | <b>0.12</b> | <b>0.34</b> | <b>5.06</b> | <b>4.50</b> | <b>0</b>    | <b>0.71</b> | -      | -     | -    |
|           |             | <i>sd2</i>   | <b>0.79</b>  | <b>0.09</b> | <b>1.23</b>  | <b>0.40</b> | <b>0.06</b> | <b>0.06</b> | <b>0.07</b> | <b>0.71</b> | <b>0.31</b> | <b>0</b>    | <b>0.08</b> | -      | -     | -    |
