# Supplementary material for: Tephrostratigraphy and tephrochronology of lakes Ohrid and Prespa, Balkans
Source: Copernicus journal article supplement (doi:10.5194/bg-7-3273-2010), 2010-10-22
Supplement: Supplementary file 4 [file bg-7-3273-2010-supplement.zip]

PT0704-1

|                                | 1      | 2      | 3      | 4      | 5      | 6     | 7      | 8      | 9     | 10    | mean          | sd   |
|--------------------------------|--------|--------|--------|--------|--------|-------|--------|--------|-------|-------|---------------|------|
| SiO <sub>2</sub>               | 60.78  | 61.05  | 61.94  | 61.59  | 61.16  | 61.53 | 61.89  | 60.47  | 61.4  | 62.45 | <b>61.43</b>  | 0.59 |
| TiO <sub>2</sub>               | 0.31   | 0.41   | 0.32   | 0.43   | 0.29   | 0.33  | 0.46   | 0.39   | 0.41  | 0.34  | <b>0.37</b>   | 0.06 |
| Al <sub>2</sub> O <sub>3</sub> | 18.72  | 18.7   | 18.57  | 18.71  | 18.64  | 18.64 | 18.71  | 18.61  | 18.57 | 18.34 | <b>18.62</b>  | 0.11 |
| FeO                            | 3.39   | 3.14   | 3      | 3.33   | 3.41   | 3.08  | 3.02   | 3.54   | 3.08  | 2.74  | <b>3.17</b>   | 0.24 |
| MnO                            | 0.18   | 0.15   | 0.07   | 0.1    | 0      | 0.04  | 0.18   | 0.16   | 0.13  | 0     | <b>0.1</b>    | 0.07 |
| MgO                            | 0.91   | 0.91   | 0.52   | 0.61   | 0.61   | 0.65  | 0.89   | 0.64   | 0.69  | 0.46  | <b>0.66</b>   | 0.15 |
| CaO                            | 2.59   | 2.41   | 2.18   | 2.17   | 2.42   | 2.26  | 2.19   | 2.79   | 2.3   | 2.1   | <b>2.34</b>   | 0.22 |
| Na <sub>2</sub> O              | 3.22   | 3.6    | 4.12   | 3.21   | 3.26   | 3.67  | 3.37   | 2.97   | 3.79  | 4.19  | <b>3.54</b>   | 0.41 |
| K <sub>2</sub> O               | 9.62   | 9.47   | 8.84   | 9.46   | 9.84   | 9.32  | 9.1    | 9.88   | 9.18  | 8.73  | <b>9.34</b>   | 0.39 |
| P <sub>2</sub> O <sub>5</sub>  | 0      | 0      | 0      | 0      | 0      | 0     | 0      | 0      | 0     | 0     | <b>0</b>      | 0    |
| ClO                            | 0.29   | 0.37   | 0.45   | 0.37   | 0.38   | 0.48  | 0.55   | 0.31   | 0.45  | 0.64  | <b>0.43</b>   | 0.11 |
|                                | 100.01 | 100.01 | 100.01 | 100.01 | 100.01 | 100   | 100.01 | 100.01 | 100   | 99.99 | <b>100.01</b> |      |
| total alkali                   | 12.84  | 13.07  | 12.96  | 12.67  | 13.1   | 12.99 | 12.47  | 12.85  | 12.97 | 12.92 | <b>12.88</b>  | 0.19 |
| alkali ratio                   | 2.99   | 2.63   | 2.15   | 2.95   | 3.02   | 2.54  | 2.7    | 3.33   | 2.42  | 2.08  | <b>2.68</b>   | 0.4  |

PT0704-2

|                                | 1     | 2     | 3     | 4     | 5     | mean          | sd          | 1     | 2     | 3     | 4     | mean         | sd   | 1      | 2     | mean         | sd   |
|--------------------------------|-------|-------|-------|-------|-------|---------------|-------------|-------|-------|-------|-------|--------------|------|--------|-------|--------------|------|
| SiO <sub>2</sub>               | 52.97 | 53.4  | 57.14 | 55.39 | 56.41 | <b>55.59</b>  | <b>1.62</b> | 56.96 | 58.37 | 58.22 | 57.63 | <b>57.8</b>  | 0.44 | 60.99  | 61.91 | <b>61.45</b> | 0.45 |
| TiO <sub>2</sub>               | 0.88  | 0.96  | 0.6   | 0.28  | 0.22  | <b>0.59</b>   | <b>0.34</b> | 0.82  | 0.55  | 0.72  | 0.73  | <b>0.71</b>  | 0.11 | 0.41   | 0.41  | <b>0.41</b>  | 0    |
| Al <sub>2</sub> O <sub>3</sub> | 20.55 | 21.31 | 24.21 | 23.41 | 24.73 | <b>22.84</b>  | <b>1.83</b> | 19.66 | 21.28 | 22.04 | 23.71 | <b>21.67</b> | 1.48 | 19.04  | 18.94 | <b>18.99</b> | 0.07 |
| FeO                            | 4.93  | 4.27  | 1.85  | 2.9   | 1.73  | <b>3.14</b>   | <b>1.43</b> | 4.8   | 3.18  | 2.53  | 1.88  | <b>3.1</b>   | 1.25 | 3.31   | 2.81  | <b>3.06</b>  | 0.35 |
| MnO                            | 0.05  | 0.17  | 0     | 0.04  | 0     | <b>0.05</b>   | <b>0.07</b> | 0     | 0     | 0     | 0     | <b>0</b>     | 0    | 0      | 0.22  | <b>0.11</b>  | 0.16 |
| MgO                            | 2.63  | 1.96  | 0.28  | 0.9   | 0.6   | <b>1.27</b>   | <b>0.99</b> | 1.08  | 0.5   | 0.97  | 0.39  | <b>0.61</b>  | 0.32 | 0.94   | 0.44  | <b>0.69</b>  | 0.35 |
| CaO                            | 11.47 | 10.39 | 6.19  | 9.48  | 7.83  | <b>9.07</b>   | <b>2.09</b> | 5.56  | 4.54  | 4.76  | 5.38  | <b>5.06</b>  | 0.49 | 2.61   | 1.74  | <b>2.18</b>  | 0.42 |
| Na <sub>2</sub> O              | 2.34  | 2.63  | 3.72  | 4.06  | 3.1   | <b>3.17</b>   | <b>0.72</b> | 3.1   | 3.36  | 3.56  | 3.1   | <b>3.28</b>  | 0.22 | 3      | 5.09  | <b>4.05</b>  | 1.48 |
| K <sub>2</sub> O               | 4.03  | 4.62  | 5.88  | 3.11  | 5.1   | <b>4.55</b>   | <b>1.05</b> | 7.49  | 7.72  | 7.55  | 7.04  | <b>7.45</b>  | 0.29 | 9.28   | 7.9   | <b>8.59</b>  | 0.98 |
| P <sub>2</sub> O <sub>5</sub>  | 0     | 0.12  | 0     | 0     | 0     | <b>0.02</b>   | <b>0.05</b> | 0.23  | 0.14  | 0     | 0     | <b>0.09</b>  | 0.11 | 0      | 0     | <b>0</b>     | 0    |
| ClO                            | 0.15  | 0.16  | 0.13  | 0.45  | 0.23  | <b>0.22</b>   | <b>0.13</b> | 0.3   | 0.36  | 0.15  | 0.14  | <b>0.24</b>  | 0.11 | 0.43   | 0.53  | <b>0.48</b>  | 0.07 |
|                                | 47.03 | 99.99 | 100   | 99.98 | 99.99 | <b>100.52</b> |             | 100   | 100   | 100   | 100   | <b>100</b>   |      | 100.01 | 99.99 | <b>100</b>   |      |
| total alkali                   | 6.37  | 7.25  | 9.6   | 7.17  | 8.2   | <b>7.72</b>   | <b>1.24</b> | 10.59 | 11.08 | 11.11 | 10.14 | <b>10.73</b> | 0.46 | 12.28  | 12.99 | <b>12.64</b> | 0.5  |
| alkali ratio                   | 1.72  | 1.76  | 1.58  | 0.77  | 1.65  | <b>1.49</b>   | <b>0.41</b> | 2.42  | 2.3   | 2.12  | 2.27  | <b>2.28</b>  | 0.12 | 3.09   | 1.55  | <b>2.32</b>  | 1.09 |

PT0704-3a

|                                | 1      | 2     | 3     | 4      | 5     | 6     | 7     | 8      | 9     | 10    | 11    | 12    | 13    | 14    | 15    | 16     | 17    | 18    | 19     | 20     |
|--------------------------------|--------|-------|-------|--------|-------|-------|-------|--------|-------|-------|-------|-------|-------|-------|-------|--------|-------|-------|--------|--------|
| SiO <sub>2</sub>               | 60.52  | 60.41 | 60.89 | 60.84  | 60.91 | 60.63 | 60.79 | 60.93  | 60.68 | 60.62 | 60.76 | 60.9  | 60.87 | 60.84 | 61.2  | 60.68  | 60.58 | 61.23 | 60.83  | 60.66  |
| TiO <sub>2</sub>               | 0.52   | 0.49  | 0.43  | 0.32   | 0.36  | 0.47  | 0.46  | 0.45   | 0.32  | 0.31  | 0.5   | 0.42  | 0.54  | 0.34  | 0.41  | 0.4    | 0.5   | 0.46  | 0.35   | 0.47   |
| Al <sub>2</sub> O <sub>3</sub> | 19.01  | 19.17 | 19.15 | 19.38  | 19.1  | 19.09 | 18.99 | 19.07  | 19.26 | 19.23 | 19.28 | 19.23 | 19.23 | 19.07 | 18.78 | 19.08  | 19.05 | 19.11 | 19.16  | 18.95  |
| FeO                            | 2.99   | 3.02  | 2.81  | 2.89   | 2.95  | 2.92  | 2.89  | 2.92   | 2.86  | 2.91  | 2.86  | 2.92  | 2.91  | 2.86  | 3     | 2.83   | 2.93  | 2.91  | 2.95   | 3.04   |
| MnO                            | 0.28   | 0.31  | 0.25  | 0.24   | 0.17  | 0.25  | 0.23  | 0.27   | 0.13  | 0.21  | 0.28  | 0.22  | 0.42  | 0.25  | 0.14  | 0.3    | 0.32  | 0.22  | 0.3    | 0.32   |
| MgO                            | 0.4    | 0.35  | 0.46  | 0.39   | 0.38  | 0.43  | 0.44  | 0.46   | 0.54  | 0.46  | 0.23  | 0.43  | 0.38  | 0.34  | 0.42  | 0.32   | 0.51  | 0.41  | 0.39   | 0.4    |
| CaO                            | 1.67   | 1.66  | 1.47  | 1.5    | 1.76  | 1.66  | 1.73  | 1.66   | 1.67  | 1.64  | 1.62  | 1.71  | 1.61  | 1.55  | 1.62  | 1.8    | 1.61  | 1.52  | 1.59   | 1.67   |
| Na <sub>2</sub> O              | 6.37   | 6.62  | 6.35  | 6.43   | 6.47  | 6.56  | 6.1   | 6.23   | 6.53  | 6.41  | 6.53  | 6.44  | 6.04  | 6.49  | 6.1   | 6.14   | 6.59  | 6.02  | 6.43   | 6.35   |
| K <sub>2</sub> O               | 7.44   | 7.29  | 7.53  | 7.26   | 7.22  | 7.27  | 7.51  | 7.33   | 7.42  | 7.7   | 7.29  | 7.07  | 7.18  | 7.4   | 7.62  | 7.72   | 7.19  | 7.36  | 7.32   | 7.5    |
| P <sub>2</sub> O <sub>5</sub>  | 0      | 0     | 0     | 0      | 0     | 0     | 0     | 0      | 0     | 0     | 0     | 0     | 0     | 0     | 0     | 0      | 0     | 0     | 0      | 0      |
| ClO                            | 0.81   | 0.67  | 0.66  | 0.75   | 0.74  | 0.68  | 0.73  | 0.69   | 0.69  | 0.7   | 0.6   | 0.66  | 0.69  | 0.72  | 0.71  | 0.74   | 0.72  | 0.75  | 0.69   | 0.65   |
|                                | 100.01 | 99.99 | 100   | 100.01 | 100   | 99.99 | 100   | 100.01 | 100   | 99.99 | 100   | 99.99 | 99.99 | 100   | 100   | 100.01 | 100   | 99.99 | 100.01 | 100.01 |
| total alkali                   | 13.81  | 13.91 | 13.88 | 13.69  | 13.69 | 13.83 | 13.61 | 13.56  | 13.95 | 14.11 | 13.82 | 13.51 | 13.62 | 13.89 | 13.72 | 13.86  | 13.78 | 13.38 | 13.75  | 13.85  |
| alkali ratio                   | 1.17   | 1.1   | 1.19  | 1.13   | 1.12  | 1.11  | 1.23  | 1.18   | 1.14  | 1.2   | 1.12  | 1.1   | 1.11  | 1.14  | 1.25  | 1.26   | 1.09  | 1.22  | 1.14   | 1.18   |

|                                | 21    | 22    | 23    | 24    | 25    | 26    | 27    | 28     | 29    | 30     | 31     | 32    | 33    | 34    | 35    | 36    | 37    | 38    | 39    | 40    | 41    | 42    | 43    | 44    | 45     | 46    | mean         |
|--------------------------------|-------|-------|-------|-------|-------|-------|-------|--------|-------|--------|--------|-------|-------|-------|-------|-------|-------|-------|-------|-------|-------|-------|-------|-------|--------|-------|--------------|
| SiO <sub>2</sub>               | 60.37 | 61.25 | 60.68 | 60.33 | 60.85 | 60.75 | 60.56 | 61.02  | 60.62 | 61.12  | 60.61  | 60.7  | 61.27 | 60.47 |       |       |       |       |       |       |       |       |       |       |        |       | <b>60.77</b> |
| TiO <sub>2</sub>               | 0.57  | 0.36  | 0.42  | 0.6   | 0.44  | 0.51  | 0.38  | 0.48   | 0.47  | 0.38   | 0.41   | 0.44  | 0.23  | 0.49  | 61.08 | 60.34 | 60.9  | 60.64 | 60.28 | 60.68 | 60.85 | 60.87 | 60.88 | 60.6  | 61.26  | 60.72 | <b>0.42</b>  |
| Al <sub>2</sub> O <sub>3</sub> | 19.1  | 19.27 | 19.33 | 19.03 | 19.21 | 18.77 | 18.92 | 19.08  | 19.17 | 19.03  | 19.12  | 19.22 | 19.14 | 19.28 | 0.36  | 0.57  | 0.39  | 0.31  | 0.62  | 0.33  | 0.37  | 0.29  | 0.28  | 0.53  | 0.36   | 0.5   | <b>0.42</b>  |
| FeO                            | 3.01  | 2.78  | 3     | 3.05  | 2.9   | 3.23  | 3.11  | 3.13   | 2.99  | 2.99   | 3.19   | 2.79  | 2.89  | 2.97  | 19.22 | 18.93 | 19.11 | 19.19 | 19    | 19.26 | 19.27 | 19.51 | 19.45 | 19.15 | 19.2   | 18.98 | <b>2.97</b>  |
| MnO                            | 0.38  | 0.18  | 0.23  | 0.39  | 0.18  | 0.34  | 0.28  | 0.34   | 0.34  | 0.21   | 0.21   | 0.09  | 0.14  | 0.32  | 2.98  | 3.18  | 2.92  | 3.11  | 3.15  | 2.96  | 2.92  | 2.81  | 2.93  | 3.08  | 2.79   | 2.99  | <b>0.25</b>  |
| MgO                            | 0.3   | 0.49  | 0.33  | 0.34  | 0.5   | 0.32  | 0.44  | 0.35   | 0.38  | 0.34   | 0.53   | 0.53  | 0.39  | 0.37  | 0.11  | 0.35  | 0.14  | 0.27  | 0.35  | 0.2   | 0.24  | 0.13  | 0.14  | 0.33  | 0.16   | 0.15  | <b>0.41</b>  |
| CaO                            | 1.6   | 1.59  | 1.7   | 1.83  | 1.67  | 1.59  | 1.81  | 1.74   | 1.62  | 1.63   | 1.71   | 1.63  | 1.72  | 1.71  | 0.42  | 0.45  | 0.47  | 0.4   | 0.35  | 0.51  | 0.35  | 0.41  | 0.56  | 0.41  | 0.35   | 0.37  | <b>1.66</b>  |
| Na <sub>2</sub> O              | 6.74  | 6.28  | 6.55  | 6.27  | 6.52  | 6.4   | 6.31  | 6.11   | 6.41  | 6.43   | 6.56   | 6.74  | 6.23  | 6.59  | 1.59  | 1.7   | 1.82  | 1.65  | 1.72  | 1.61  | 1.56  | 1.63  | 1.59  | 1.7   | 1.77   | 1.73  | <b>6.39</b>  |
| K <sub>2</sub> O               | 7.23  | 7.09  | 7.02  | 7.35  | 7.01  | 7.36  | 7.45  | 7.07   | 7.31  | 7.12   | 7.05   | 7.11  | 7.32  | 7.13  | 6.25  | 6.35  | 6.19  | 6.51  | 6.26  | 6.31  | 6.53  | 6.75  | 6.23  | 6.34  | 6.19   | 6.56  | <b>7.29</b>  |
| P <sub>2</sub> O <sub>5</sub>  | 0     | 0     | 0     | 0     | 0     | 0     | 0     | 0      | 0     | 0      | 0      | 0     | 0     | 0     | 0     | 0     | 0     | 0     | 0     | 0     | 0     | 0     | 0     | 0     | 0      | 0     | <b>0.71</b>  |
| ClO                            | 0.7   | 0.71  | 0.74  | 0.81  | 0.72  | 0.73  | 0.74  | 0.69   | 0.68  | 0.77   | 0.62   | 0.75  | 0.67  | 0.67  | 0     | 0     | 0.06  | 0     | 0     | 0     | 0     | 0     | 0     | 0     | 0      | 0     | <b>1.00</b>  |
|                                | 100   | 100   | 100   | 100   | 100   | 100   | 100   | 100.01 | 99.99 | 100.02 | 100.01 | 100   | 100   | 100   | 99.99 | 99.99 | 100   | 100   | 100   | 100   | 100   | 100   | 100   | 100   | 100.01 | 99.99 | <b>100</b>   |
| total alkali                   | 13.97 | 13.37 | 13.57 | 13.62 | 13.53 | 13.76 | 13.76 | 13.18  | 13.72 | 13.55  | 13.61  | 13.85 | 13.55 | 13.72 | 13.59 | 13.83 | 13.48 | 13.72 | 13.72 | 13.67 | 13.73 | 13.66 | 13.43 | 13.51 | 13.52  | 13.85 | <b>13.66</b> |
| alkali ratio                   | 1.07  | 1.13  | 1.07  | 1.17  | 1.08  | 1.15  | 1.18  | 1.16   | 1.14  | 1.11   | 1.07   | 1.05  | 1.17  | 1.08  | 1.17  | 1.18  | 1.18  | 1.11  | 1.19  | 1.17  | 1.1   | 1.02  | 1.16  | 1.13  | 1.18   | 1.11  | <b>1.11</b>  |

PT0704-3b

|                                |       |       |       |       |       |       |       |      |       |       |       |       |      |
|--------------------------------|-------|-------|-------|-------|-------|-------|-------|------|-------|-------|-------|-------|------|
| SiO <sub>2</sub>               | 61.96 | 61.22 | 61.22 | 62.04 | 61.34 | 60.62 | 61.41 | 61.3 | 61.22 | 61.65 | 62.71 | 61.52 | 0.55 |
| TiO <sub>2</sub>               | 0.42  | 0.46  | 0.39  | 0.34  | 0.39  | 0.48  | 0.29  | 0.34 | 0.52  | 0.21  | 0.52  | 0.4   | 0.1  |
| Al <sub>2</sub> O <sub>3</sub> | 19.56 | 19.21 | 19.16 | 19.54 | 20.12 | 18.95 | 19.11 | 19.1 | 19.47 | 19.47 | 18.42 | 19.28 | 0.43 |
| FeO                            | 3.06  | 3.16  | 3.04  | 2.66  | 2.79  | 3.1   | 3.22  | 2.94 | 2.76  | 2.89  | 2.91  | 2.96  | 0.18 |
| MnO                            | 0.13  | 0.25  | 0.21  | 0.08  | 0.17  | 0.26  | 0.2   | 0.29 | 0.42  | 0.2   | 0.31  | 0.23  | 0.09 |
| MgO                            | 0.49  | 0.39  | 0.29  | 0.53  | 0.57  | 0.38  | 0.48  | 0.49 | 0.57  | 0.5   | 0.4   | 0.46  | 0.09 |
| CaO                            | 1.53  | 1.69  | 1.71  | 1.78  | 1.64  | 1.73  | 1.66  | 1.69 | 1.57  | 1.64  | 1.5   | 1.65  | 0.15 |
| Na <sub>2</sub> O              | 5.21  | 5.77  | 5.98  | 5.45  | 5.34  | 5.42  | 5.69  | 5.62 | 5.89  | 5.8   | 5.73  | 5.63  | 0.24 |
| SiO <sub>2</sub>               | 7.07  | 7.24  | 7.3   | 7.07  | 7.24  | 8.35  | 7.19  | 7.5  | 6.89  | 6.98  | 6.75  | 7.23  | 0.42 |

| Foglio1                        |        |        |       |       |        |       |        |       |       |       |       |       |      |
|--------------------------------|--------|--------|-------|-------|--------|-------|--------|-------|-------|-------|-------|-------|------|
| K <sub>2</sub> O               | 0      | 0      | 0     | 0     | 0      | 0     | 0      | 0     | 0     | 0     | 0     | 0     | 0    |
| P <sub>2</sub> O <sub>5</sub>  | 0.56   | 0.61   | 0.7   | 0.5   | 0.41   | 0.7   | 0.76   | 0.73  | 0.68  | 0.66  | 0.75  | 0.64  | 0.77 |
| ClO                            | 99.99  | 100    | 100   | 99.99 | 100.01 | 99.99 | 100.01 | 100   | 99.99 | 100   | 100   | 100   |      |
| total alkali                   | 12.28  | 13.01  | 13.28 | 12.52 | 12.98  | 13.77 | 12.88  | 13.12 | 12.78 | 12.78 | 12.48 | 12.86 | 0.42 |
| alkali ratio                   | 1.36   | 1.25   | 1.22  | 1.3   | 1.36   | 1.54  | 1.26   | 1.33  | 1.17  | 1.2   | 1.18  | 1.29  | 0.77 |
| PT0704-3c                      | 1      | 2      | 3     | 4     | 5      | 6     | 7      | 8     | 9     | mean  | sd    |       |      |
|                                | 60.5   | 61.06  | 60.6  | 60.72 | 60.81  | 60.4  | 58.36  | 58.93 | 61.48 | 60.32 | 1.01  |       |      |
| SiO <sub>2</sub>               | 0.38   | 0.36   | 0.53  | 0.28  | 0.48   | 0.34  | 0.5    | 0.55  | 0.2   | 0.4   | 0.12  |       |      |
| TiO <sub>2</sub>               | 18.9   | 19.09  | 19.02 | 18.9  | 18.96  | 19.08 | 19.17  | 18.8  | 18.94 | 18.98 | 0.12  |       |      |
| Al <sub>2</sub> O <sub>3</sub> | 3.58   | 2.92   | 3.18  | 3.31  | 3.29   | 3.45  | 3.91   | 4.39  | 3.01  | 3.45  | 0.46  |       |      |
| FeO                            | 0      | 0.17   | 0.27  | 0.09  | 0.13   | 0.09  | 0.19   | 0.13  | 0     | 0.12  | 0.09  |       |      |
| MnO                            | 0.93   | 0.69   | 0.6   | 0.69  | 0.74   | 0.93  | 0.82   | 1.21  | 0.62  | 0.8   | 0.19  |       |      |
| MgO                            | 2.68   | 2.01   | 2.26  | 2.34  | 2.3    | 2.4   | 3.31   | 2.84  | 2.23  | 2.49  | 0.4   |       |      |
| CaO                            | 2.82   | 3.88   | 3.31  | 3.68  | 3.48   | 3.08  | 3.55   | 3.84  | 3.71  | 3.48  | 0.36  |       |      |
| Na <sub>2</sub> O              | 9.93   | 9.44   | 9.91  | 9.64  | 9.47   | 9.91  | 9.66   | 8.77  | 9.36  | 9.57  | 0.37  |       |      |
| K <sub>2</sub> O               | 0      | 0      | 0     | 0     | 0      | 0     | 0      | 0     | 0     | 0     | 0     |       |      |
| P <sub>2</sub> O <sub>5</sub>  | 0.29   | 0.39   | 0.31  | 0.33  | 0.35   | 0.32  | 0.53   | 0.54  | 0.44  | 0.39  | 0.09  |       |      |
| ClO                            | 100.01 | 100.01 | 99.99 | 99.98 | 100.01 | 100   | 100    | 100   | 99.99 | 100   |       |       |      |
| total alkali                   | 12.75  | 13.32  | 13.22 | 13.32 | 12.95  | 12.99 | 13.21  | 12.61 | 13.07 | 13.05 | 0.25  |       |      |
| alkali ratio                   | 3.52   | 2.43   | 2.99  | 2.62  | 2.72   | 3.22  | 2.72   | 2.28  | 2.52  | 2.78  | 0.4   |       |      |

sd  
0.25  
0.09  
0.15  
0.11  
0.06  
0.07  
0.06  
0.19  
0.18  
0.01  
0.05

0.17  
5.75
