# Supplementary material for: Tephrostratigraphy and tephrochronology of lakes Ohrid and Prespa, Balkans
Source: Copernicus journal article supplement (doi:10.5194/bg-7-3273-2010), 2010-10-22
Supplement: Supplementary file 5 [file bg-7-3273-2010-supplement.zip]

Fogliol

OT0520-1

|                                | 1      | 2     | 3      | 4     | 5     | 6     | 7      | 8     | 9     | 10    | 11    | 12    | 13    | 14    | 15     | mean         | sd          |
|--------------------------------|--------|-------|--------|-------|-------|-------|--------|-------|-------|-------|-------|-------|-------|-------|--------|--------------|-------------|
| SiO <sub>2</sub>               | 53.91  | 53.74 | 53.83  | 54.11 | 54.84 | 55.74 | 53.49  | 54.18 | 54.25 | 54.61 | 53.73 | 54.1  | 53.18 | 55.75 | 54.25  | <b>54.25</b> | <b>0.73</b> |
| TiO <sub>2</sub>               | 1.72   | 1.88  | 1.76   | 1.83  | 1.27  | 1.81  | 1.81   | 2.01  | 1.85  | 1.88  | 1.84  | 1.84  | 1.74  | 1.25  | 1.97   | <b>1.76</b>  | <b>0.22</b> |
| Al <sub>2</sub> O <sub>3</sub> | 17.36  | 17.29 | 17.56  | 17.04 | 18.4  | 17.44 | 17.39  | 16.7  | 17.32 | 17.08 | 17.94 | 17.27 | 18.13 | 18.36 | 16.92  | <b>17.48</b> | <b>0.51</b> |
| FeO <sub>tot</sub>             | 8.17   | 8.57  | 8.44   | 8.46  | 7.28  | 7.44  | 8.36   | 8.92  | 8.19  | 8.29  | 8.22  | 8.43  | 7.92  | 6.98  | 8.62   | <b>8.15</b>  | <b>0.53</b> |
| MnO                            | 0      | 0     | 0      | 0     | 0     | 0     | 0      | 0     | 0     | 0     | 0     | 0     | 0     | 0     | 0      | <b>0</b>     | <b>0</b>    |
| MgO                            | 2.87   | 2.56  | 2.75   | 2.8   | 2.61  | 1.92  | 3.15   | 2.95  | 2.93  | 2.82  | 3.3   | 3.07  | 3.15  | 2.88  | 3.03   | <b>2.85</b>  | <b>0.33</b> |
| CaO                            | 5.97   | 5.88  | 5.98   | 6.15  | 5.46  | 5.22  | 6.35   | 5.74  | 6.43  | 5.81  | 6.82  | 6.57  | 6.37  | 5.07  | 6.44   | <b>6.02</b>  | <b>0.5</b>  |
| Na <sub>2</sub> O              | 5.69   | 5.63  | 5.24   | 5.42  | 6.1   | 5.46  | 5.92   | 5.09  | 4.94  | 5.32  | 4.83  | 5.18  | 5.55  | 5.94  | 4.72   | <b>5.4</b>   | <b>0.41</b> |
| K <sub>2</sub> O               | 3.36   | 3.59  | 3.55   | 3.26  | 3.31  | 3.98  | 2.95   | 3.66  | 3.14  | 3.44  | 2.66  | 2.89  | 3.39  | 2.94  | 3.26   | <b>3.29</b>  | <b>0.34</b> |
| P <sub>2</sub> O <sub>5</sub>  | 0.65   | 0.51  | 0.51   | 0.59  | 0.44  | 0.61  | 0.35   | 0.46  | 0.64  | 0.45  | 0.38  | 0.38  | 0.35  | 0.42  | 0.48   | <b>0.48</b>  | <b>0.1</b>  |
| Cl                             | 0.31   | 0.35  | 0.39   | 0.34  | 0.28  | 0.38  | 0.25   | 0.28  | 0.3   | 0.28  | 0.28  | 0.27  | 0.2   | 0.41  | 0.32   | <b>0.31</b>  | <b>0.06</b> |
| Total                          | 100.01 | 100   | 100.01 | 100   | 99.99 | 100   | 100.02 | 99.99 | 99.99 | 99.98 | 100   | 100   | 99.98 | 100   | 100.01 | <b>100</b>   |             |
| Total alkali                   | 9.05   | 9.22  | 8.79   | 8.68  | 9.41  | 9.44  | 8.87   | 8.75  | 8.08  | 8.76  | 7.49  | 8.07  | 8.94  | 8.88  | 7.98   | <b>8.69</b>  | <b>0.56</b> |
| Alkali ratio                   | 0.59   | 0.64  | 0.68   | 0.6   | 0.54  | 0.73  | 0.5    | 0.72  | 0.64  | 0.65  | 0.55  | 0.56  | 0.61  | 0.49  | 0.69   | <b>0.61</b>  | <b>0.07</b> |

OT0520-2

|                                | 1     | 2     | 3     | 4     | 5     | 6     | 7     | 8    | 9     | 10    | 11    | 12    | mean         | sd          |
|--------------------------------|-------|-------|-------|-------|-------|-------|-------|------|-------|-------|-------|-------|--------------|-------------|
| SiO <sub>2</sub>               | 62.38 | 62.19 | 62.14 | 62.26 | 62.44 | 61.65 | 61.31 | 62.1 | 62.13 | 61.93 | 60.8  | 61.19 | <b>61.88</b> | <b>0.52</b> |
| TiO <sub>2</sub>               | 0.35  | 0.2   | 0.26  | 0.29  | 0.25  | 0.22  | 0.25  | 0.32 | 0.22  | 0.38  | 0.48  | 0.29  | <b>0.29</b>  | <b>0.08</b> |
| Al <sub>2</sub> O <sub>3</sub> | 18.33 | 18.79 | 18.59 | 18.46 | 18.61 | 18.71 | 18.96 | 18.8 | 18.51 | 18.38 | 18.71 | 18.74 | <b>18.63</b> | <b>0.19</b> |
| FeO <sub>tot</sub>             | 2.55  | 2.7   | 2.81  | 2.83  | 2.77  | 3.06  | 2.95  | 2.83 | 3.1   | 2.89  | 3.31  | 3.26  | <b>2.92</b>  | <b>0.23</b> |
| MnO                            | 0.06  | 0     | 0     | 0.09  | 0     | 0     | 0     | 0    | 0     | 0.19  | 0.07  | 0     | <b>0.03</b>  | <b>0.06</b> |
| MgO                            | 0.45  | 0.39  | 0.38  | 0.34  | 0.37  | 0.5   | 0.65  | 0.43 | 0.41  | 0.53  | 0.82  | 0.71  | <b>0.5</b>   | <b>0.15</b> |
| CaO                            | 2.18  | 2.19  | 2.23  | 2     | 2.02  | 2.32  | 2.38  | 2    | 2.1   | 2     | 2.47  | 2.52  | <b>2.2</b>   | <b>0.19</b> |
| Na <sub>2</sub> O              | 4.4   | 4.5   | 4.4   | 4.76  | 4.54  | 3.66  | 3.41  | 4.3  | 4.26  | 4.65  | 3.61  | 3.62  | <b>4.18</b>  | <b>0.47</b> |
| K <sub>2</sub> O               | 8.6   | 8.44  | 8.6   | 8.26  | 8.33  | 9.44  | 9.8   | 8.64 | 8.73  | 8.38  | 9.3   | 9.29  | <b>8.82</b>  | <b>0.51</b> |
| P <sub>2</sub> O <sub>5</sub>  | 0     | 0     | 0     | 0     | 0     | 0     | 0     | 0    | 0     | 0     | 0     | 0     | <b>0</b>     | <b>0</b>    |
| Cl                             | 0.69  | 0.58  | 0.59  | 0.71  | 0.67  | 0.43  | 0.28  | 0.58 | 0.54  | 0.66  | 0.42  | 0.37  | <b>0.54</b>  | <b>0.14</b> |
| Total                          | 99.99 | 99.98 | 100   | 100   | 100   | 99.99 | 99.99 | 100  | 100   | 99.99 | 99.99 | 99.99 | <b>99.99</b> |             |

Foglio1

|                                |       |       |       |       |       |       |              |             |       |       |       |              |              |             |
|--------------------------------|-------|-------|-------|-------|-------|-------|--------------|-------------|-------|-------|-------|--------------|--------------|-------------|
| Total alkali                   | 13    | 12.94 | 13    | 13.02 | 12.87 | 13.1  | 13.21        | 12.94       | 12.99 | 13.03 | 12.91 | 12.91        | <b>12.99</b> | <b>0.09</b> |
| Alkali ratio                   | 1.95  | 1.88  | 1.95  | 1.74  | 1.83  | 2.58  | 2.87         | 2.01        | 2.05  | 1.8   | 2.58  | 2.57         | <b>2.15</b>  | <b>0.39</b> |
| OT0520-3                       |       |       |       |       |       |       |              |             |       |       |       |              |              |             |
|                                | 1     | 2     | 3     | 4     | 5     | 6     | mean         | sd          | 1     | 2     | 3     | mean         | sd           | 1           |
| SiO <sub>2</sub>               | 62.18 | 61.93 | 62.19 | 62.25 | 61.25 | 61.81 | <b>61.94</b> | <b>0.38</b> | 61.15 | 61.32 | 61.02 | <b>61.16</b> | <b>0.15</b>  | 61.29       |
| TiO <sub>2</sub>               | 0.47  | 0.46  | 0.44  | 0.36  | 0.42  | 0.43  | <b>0.43</b>  | <b>0.04</b> | 0.44  | 0.4   | 0.44  | <b>0.43</b>  | <b>0.02</b>  | 0.42        |
| Al <sub>2</sub> O <sub>3</sub> | 19.27 | 19.13 | 19.36 | 18.83 | 19.04 | 18.92 | <b>19.09</b> | <b>0.2</b>  | 19.03 | 18.89 | 18.97 | <b>18.96</b> | <b>0.07</b>  | 19.08       |
| FeO <sub>tot</sub>             | 3     | 3.1   | 2.95  | 2.95  | 3.12  | 3.03  | <b>3.03</b>  | <b>0.07</b> | 3.12  | 3.04  | 2.94  | <b>3.03</b>  | <b>0.09</b>  | 3.15        |
| MnO                            | 0.26  | 0.23  | 0.24  | 0.16  | 0.11  | 0.18  | <b>0.2</b>   | <b>0.05</b> | 0.24  | 0.23  | 0.23  | <b>0.23</b>  | <b>0.01</b>  | 0.11        |
| MgO                            | 0.35  | 0.37  | 0.35  | 0.57  | 0.65  | 0.48  | <b>0.46</b>  | <b>0.13</b> | 0.35  | 0.35  | 0.35  | <b>0.35</b>  | <b>0</b>     | 0.61        |
| CaO                            | 1.76  | 1.74  | 1.83  | 2.1   | 2.39  | 1.98  | <b>1.97</b>  | <b>0.25</b> | 1.69  | 1.78  | 1.69  | <b>1.72</b>  | <b>0.05</b>  | 2.41        |
| Na <sub>2</sub> O              | 4.96  | 5     | 4.89  | 4.44  | 4.12  | 5.31  | <b>4.79</b>  | <b>0.43</b> | 6.22  | 6.27  | 6.02  | <b>6.17</b>  | <b>0.13</b>  | 3.85        |
| K <sub>2</sub> O               | 6.83  | 7.22  | 6.94  | 7.86  | 8.27  | 7.2   | <b>7.39</b>  | <b>0.56</b> | 6.91  | 6.85  | 7.48  | <b>7.08</b>  | <b>0.35</b>  | 8.38        |
| P <sub>2</sub> O <sub>5</sub>  | 0.09  | 0.04  | 0     | 0.11  | 0.09  | 0.07  | <b>0.07</b>  | <b>0.04</b> | 0.04  | 0.05  | 0.06  | <b>0.05</b>  | <b>0.01</b>  | 0.19        |
| Cl                             | 0.83  | 0.77  | 0.81  | 0.36  | 0.53  | 0.59  | <b>0.65</b>  | <b>0.19</b> | 0.8   | 0.81  | 0.8   | <b>0.81</b>  | <b>0.01</b>  | 0.51        |
| Total                          | 100   | 100   | 100   | 100   | 100   | 100   | <b>100</b>   |             | 100   | 100   | 100   | <b>100</b>   |              | 100         |
| Total alkali                   | 11.79 | 12.23 | 11.83 | 12.3  | 12.39 | 12.52 | <b>12.18</b> | <b>0.3</b>  | 13.13 | 13.12 | 13.49 | <b>13.25</b> | <b>0.21</b>  | 12.24       |
| Alkali ratio                   | 1.38  | 1.44  | 1.42  | 1.77  | 2.01  | 1.36  | <b>1.56</b>  | <b>0.27</b> | 1.11  | 1.09  | 1.24  | <b>1.15</b>  | <b>0.08</b>  | 2.18        |

972 cm

---

**1140-1145 cm**

---

---
