# Supplementary material for: Tephrostratigraphy and tephrochronology of lakes Ohrid and Prespa, Balkans
Source: Copernicus journal article supplement (doi:10.5194/bg-7-3273-2010), 2010-10-22
Supplement: Supplementary file 6 [file bg-7-3273-2010-supplement.zip]

OT0701-15a

|                                | 1     | 2     | 3     | 4     | 5     | 6     | 7      | 8     | 9      | 10    | 11    | 12    | 13     | 14    | 15     | 16     | 17    | 18    | 19    | 20     | 21     | 22    | 23    | 24    | 25     | 26    | mean  | sd   |
|--------------------------------|-------|-------|-------|-------|-------|-------|--------|-------|--------|-------|-------|-------|--------|-------|--------|--------|-------|-------|-------|--------|--------|-------|-------|-------|--------|-------|-------|------|
| SiO <sub>2</sub>               | 60.11 | 60.55 | 60.68 | 60.74 | 60.93 | 60.68 | 60.87  | 61.27 | 60.7   | 60.45 | 60.72 | 60.84 | 60.95  | 60.63 | 60.93  | 60.81  | 60.58 | 61.6  | 61.47 | 60.62  | 60.49  | 60.42 | 60.95 | 60.81 | 61.36  | 60.73 | 60.8  | 0.33 |
| TiO <sub>2</sub>               | 0.54  | 0.53  | 0.41  | 0.47  | 0.32  | 0.45  | 0.24   | 0.31  | 0.46   | 0.52  | 0.27  | 0.48  | 0.52   | 0.33  | 0.33   | 0.22   | 0.47  | 0.39  | 0.38  | 0.42   | 0.57   | 0.49  | 0.39  | 0.46  | 0.44   | 0.41  | 0.42  | 0.09 |
| Al <sub>2</sub> O <sub>3</sub> | 19.08 | 19.08 | 19.08 | 19.06 | 19.23 | 18.97 | 19.09  | 19.07 | 19.28  | 19.02 | 19.43 | 19.23 | 19.05  | 19.28 | 19.46  | 19.1   | 19.13 | 19.09 | 19.18 | 19.05  | 19.24  | 19.26 | 19.22 | 19.15 | 18.91  | 19.08 | 19.15 | 0.13 |
| FeO                            | 3.19  | 3.06  | 2.97  | 2.96  | 2.86  | 2.98  | 3.02   | 2.89  | 3.21   | 3.08  | 2.87  | 2.9   | 3.13   | 2.88  | 2.93   | 3      | 3.31  | 2.8   | 2.82  | 3      | 3.07   | 3.19  | 2.95  | 2.93  | 2.91   | 2.9   | 2.99  | 0.13 |
| MnO                            | 0.38  | 0.33  | 0.16  | 0.19  | 0.15  | 0.24  | 0.11   | 0.27  | 0.29   | 0.21  | 0.19  | 0.36  | 0.2    | 0.05  | 0.12   | 0.12   | 0.33  | 0.22  | 0.1   | 0.39   | 0.27   | 0.37  | 0.34  | 0.17  | 0.34   | 0.19  | 0.23  | 0.1  |
| MgO                            | 0.41  | 0.43  | 0.41  | 0.4   | 0.26  | 0.38  | 0.41   | 0.43  | 0.32   | 0.28  | 0.41  | 0.33  | 0.3    | 0.55  | 0.37   | 0.36   | 0.51  | 0.37  | 0.5   | 0.28   | 0.37   | 0.42  | 0.48  | 0.3   | 0.42   | 0.34  | 0.39  | 0.07 |
| CaO                            | 1.71  | 1.71  | 1.64  | 1.75  | 1.79  | 1.7   | 1.43   | 1.73  | 1.61   | 1.68  | 1.56  | 1.58  | 1.63   | 1.75  | 1.82   | 1.77   | 1.46  | 1.58  | 1.64  | 1.82   | 1.63   | 1.73  | 1.7   | 1.71  | 1.71   | 1.71  | 1.68  | 0.1  |
| Na <sub>2</sub> O              | 6.6   | 6.57  | 6.64  | 6.66  | 6.26  | 6.3   | 6.48   | 6.21  | 6.23   | 6.7   | 6.67  | 6.29  | 6.3    | 6.66  | 6.24   | 6.08   | 6.47  | 6.09  | 6.12  | 6.49   | 6.53   | 6.4   | 6.05  | 6.41  | 6.06   | 6.42  | 6.38  | 0.21 |
| K <sub>2</sub> O               | 7.21  | 7.06  | 7.33  | 7.11  | 7.45  | 7.57  | 7.65   | 7.17  | 7.24   | 7.3   | 7.14  | 7.29  | 7.22   | 7.13  | 7.1    | 7.82   | 7.15  | 7.1   | 7.13  | 7.26   | 7.24   | 7.01  | 7.11  | 7.29  | 7.12   | 7.46  | 7.26  | 0.19 |
| P <sub>2</sub> O <sub>5</sub>  | 0     | 0     | 0     | 0     | 0     | 0     | 0      | 0     | 0      | 0     | 0     | 0     | 0      | 0     | 0      | 0      | 0     | 0     | 0     | 0      | 0      | 0     | 0     | 0     | 0      | 0     | 0     | 0    |
| ClO                            | 0.77  | 0.68  | 0.68  | 0.66  | 0.75  | 0.73  | 0.71   | 0.65  | 0.67   | 0.75  | 0.72  | 0.69  | 0.72   | 0.74  | 0.71   | 0.73   | 0.58  | 0.75  | 0.66  | 0.68   | 0.6    | 0.71  | 0.8   | 0.77  | 0.74   | 0.76  | 0.71  | 0.05 |
|                                | 100   | 100   | 100   | 100   | 100   | 100   | 100.01 | 100   | 100.01 | 99.99 | 99.98 | 99.99 | 100.02 | 100   | 100.01 | 100.01 | 99.99 | 99.99 | 100   | 100.01 | 100.01 | 100   | 99.99 | 100   | 100.01 | 100   | 100   | 100  |
| total alkali                   | 13.81 | 13.63 | 13.97 | 13.77 | 13.71 | 13.87 | 14.13  | 13.38 | 13.47  | 14    | 13.81 | 13.58 | 13.52  | 13.79 | 13.34  | 13.9   | 13.62 | 13.19 | 13.25 | 13.75  | 13.77  | 13.41 | 13.16 | 13.7  | 13.18  | 13.88 | 13.64 | 0.27 |
| alkali ratio                   | 1.09  | 1.07  | 1.1   | 1.07  | 1.19  | 1.2   | 1.18   | 1.15  | 1.16   | 1.09  | 1.07  | 1.16  | 1.15   | 1.07  | 1.14   | 1.29   | 1.11  | 1.17  | 1.17  | 1.12   | 1.11   | 1.1   | 1.18  | 1.14  | 1.17   | 1.16  | 1.14  | 0.05 |

OT0701-15b

|                                | 1     | 2     | 3     | 4      | 5     | 6     | 7     | 8      | 9     | 10    | 11    | mean  | sd   |
|--------------------------------|-------|-------|-------|--------|-------|-------|-------|--------|-------|-------|-------|-------|------|
| SiO <sub>2</sub>               | 61.46 | 61.12 | 62.21 | 61.14  | 61.48 | 61.68 | 60.91 | 61.04  | 61.12 | 61.16 | 61.2  | 61.32 | 0.37 |
| TiO <sub>2</sub>               | 0.57  | 0.41  | 0.3   | 0.45   | 0.2   | 0.33  | 0.43  | 0.44   | 0.29  | 0.39  | 0.58  | 0.4   | 0.12 |
| Al <sub>2</sub> O <sub>3</sub> | 18.99 | 18.95 | 18.39 | 19.08  | 19.36 | 18.95 | 19.18 | 19.54  | 19.52 | 19.41 | 19.06 | 19.13 | 0.33 |
| FeO                            | 3.1   | 3.02  | 2.76  | 2.77   | 2.92  | 2.82  | 3.05  | 3.1    | 2.95  | 3.34  | 3.07  | 2.99  | 0.17 |
| MnO                            | 0.25  | 0.08  | 0     | 0.15   | 0     | 0.11  | 0     | 0.16   | 0.11  | 0.09  | 0.29  | 0.14  | 0.12 |
| MgO                            | 0.45  | 0.4   | 0.51  | 0.29   | 0.34  | 0.61  | 0.5   | 0.43   | 0.48  | 0.76  | 0.47  | 0.48  | 0.13 |
| CaO                            | 2.16  | 1.74  | 2.16  | 1.7    | 1.62  | 2.17  | 1.57  | 1.74   | 1.8   | 2.27  | 1.67  | 1.87  | 0.26 |
| Na <sub>2</sub> O              | 5.43  | 5.87  | 4.63  | 5.8    | 5.89  | 5.3   | 5.94  | 5.73   | 5.58  | 4.89  | 5.77  | 5.53  | 0.43 |
| K <sub>2</sub> O               | 7.24  | 7.82  | 8.47  | 7.88   | 7.56  | 7.71  | 7.5   | 7.1    | 7.32  | 7.34  | 7.14  | 7.55  | 0.4  |
| P <sub>2</sub> O <sub>5</sub>  | 0     | 0     | 0     | 0      | 0     | 0     | 0     | 0      | 0     | 0     | 0     | 0     | 0    |
| ClO                            | 0.33  | 0.61  | 0.57  | 0.75   | 0.63  | 0.31  | 0.75  | 0.79   | 0.68  | 0.34  | 0.65  | 0.58  | 0.18 |
|                                | 99.98 | 100   | 100   | 100.01 | 100   | 99.99 | 99.99 | 100.01 | 99.99 | 99.99 | 100   | 100   |      |
| total alkali                   | 12.67 | 13.69 | 13.1  | 13.68  | 13.45 | 13.01 | 13.44 | 12.83  | 12.9  | 12.23 | 12.91 | 13.08 | 0.45 |
| alkali ratio                   | 1.33  | 1.33  | 1.83  | 1.36   | 1.28  | 1.45  | 1.26  | 1.24   | 1.31  | 1.5   | 1.24  | 1.38  | 0.17 |

OT0701-15c

|                                | 1     | 2     | 3     | 4     | mean  | sd   |
|--------------------------------|-------|-------|-------|-------|-------|------|
| SiO <sub>2</sub>               | 61.26 | 60.56 | 60.92 | 59.37 | 60.53 | 0.82 |
| TiO <sub>2</sub>               | 0.29  | 0.3   | 0.36  | 0.48  | 0.36  | 0.09 |
| Al <sub>2</sub> O <sub>3</sub> | 18.8  | 18.78 | 18.73 | 20.43 | 19.19 | 0.83 |
| FeO                            | 2.99  | 3.46  | 3.12  | 3.37  | 3.24  | 0.21 |
| MnO                            | 0.1   | 0.15  | 0     | 0.11  | 0.09  | 0.06 |
| MgO                            | 0.62  | 0.72  | 0.68  | 0.83  | 0.71  | 0.09 |
| CaO                            | 2.28  | 2.44  | 2.38  | 2.6   | 2.43  | 0.13 |
| Na <sub>2</sub> O              | 3.82  | 3.27  | 3.55  | 3.12  | 3.44  | 0.31 |
| K <sub>2</sub> O               | 9.48  | 9.97  | 9.92  | 9.4   | 9.69  | 0.29 |
| P <sub>2</sub> O <sub>5</sub>  | 0     | 0     | 0     | 0     | 0     | 0    |
| ClO                            | 0.35  | 0.34  | 0.33  | 0.28  | 0.33  | 0.03 |
|                                | 99.99 | 99.99 | 99.99 | 99.99 | 99.99 |      |
| total alkali                   | 13.3  | 13.24 | 13.47 | 12.52 | 13.13 | 0.42 |
| alkali ratio                   | 2.48  | 3.05  | 2.79  | 3.01  | 2.83  | 0.26 |

OT0701-6

|                                | 1     | 2     | 3     | 4      | 5      | 6     | 7      | 8     | 9      | 10    | 11    | 12     | 13     | 14     | 15    | mean  | sd   |
|--------------------------------|-------|-------|-------|--------|--------|-------|--------|-------|--------|-------|-------|--------|--------|--------|-------|-------|------|
| SiO <sub>2</sub>               | 59.75 | 59.33 | 59.72 | 59.62  | 59.54  | 59.45 | 59.77  | 59.13 | 59.27  | 59.7  | 59.53 | 59.59  | 60.07  | 59.72  | 59.57 | 59.58 | 0.23 |
| TiO <sub>2</sub>               | 0.45  | 0.51  | 0.48  | 0.41   | 0.57   | 0.43  | 0.37   | 0.57  | 0.42   | 0.35  | 0.46  | 0.43   | 0.39   | 0.35   | 0.41  | 0.44  | 0.07 |
| Al <sub>2</sub> O <sub>3</sub> | 20.09 | 19.92 | 20.04 | 19.81  | 19.96  | 19.96 | 20.02  | 20.22 | 20.04  | 20.2  | 20.15 | 19.98  | 20.07  | 20.16  | 20.15 | 20.04 | 0.12 |
| FeO                            | 2.81  | 2.96  | 2.68  | 2.86   | 2.92   | 2.91  | 2.65   | 2.68  | 2.82   | 2.64  | 2.9   | 2.75   | 2.49   | 2.56   | 2.82  | 2.76  | 0.14 |
| MnO                            | 0     | 0.19  | 0.16  | 0.12   | 0.27   | 0.13  | 0      | 0.17  | 0.27   | 0     | 0.17  | 0.09   | 0      | 0.17   | 0.14  | 0.13  | 0.09 |
| MgO                            | 0.54  | 0.5   | 0.38  | 0.55   | 0.4    | 0.68  | 0.49   | 0.59  | 0.62   | 0.55  | 0.47  | 0.59   | 0.43   | 0.47   | 0.44  | 0.51  | 0.09 |
| CaO                            | 2.23  | 2.29  | 2.34  | 2.37   | 2.31   | 2.39  | 2.45   | 2.29  | 2.3    | 2.24  | 2.19  | 2.43   | 2.26   | 2.39   | 2.14  | 2.31  | 0.09 |
| Na <sub>2</sub> O              | 5.17  | 5.26  | 5.16  | 4.94   | 5.05   | 5.38  | 5.11   | 5.38  | 5.49   | 5.31  | 5.03  | 5.44   | 5.23   | 5.31   | 5.32  | 5.24  | 0.14 |
| K <sub>2</sub> O               | 8.77  | 8.86  | 8.87  | 9.13   | 8.78   | 8.46  | 9.03   | 8.76  | 8.59   | 8.8   | 8.94  | 8.68   | 8.94   | 8.73   | 8.73  | 8.8   | 0.17 |
| P <sub>2</sub> O <sub>5</sub>  | 0     | 0     | 0     | 0      | 0      | 0     | 0      | 0     | 0      | 0     | 0     | 0      | 0      | 0      | 0     | 0     | 0    |
| ClO                            | 0.18  | 0.18  | 0.16  | 0.2    | 0.21   | 0.2   | 0.12   | 0.2   | 0.19   | 0.2   | 0.16  | 0.13   | 0.13   | 0.15   | 0.27  | 0.18  | 0.04 |
|                                | 99.99 | 100   | 99.99 | 100.01 | 100.01 | 99.99 | 100.01 | 99.99 | 100.01 | 99.99 | 100   | 100.01 | 100.01 | 100.01 | 99.99 | 100   |      |
| total alkali                   | 13.94 | 14.12 | 14.03 | 14.07  | 13.83  | 13.84 | 14.14  | 14.08 | 14.11  | 13.97 | 14.12 | 14.17  | 14.04  | 14.05  | 14.04 | 14.04 | 0.11 |
| alkali ratio                   | 1.7   | 1.68  | 1.72  | 1.85   | 1.74   | 1.57  | 1.77   | 1.63  | 1.56   | 1.66  | 1.78  | 1.6    | 1.71   | 1.64   | 1.64  | 1.68  | 0.08 |

OT0701-7

|                                | 1      | 2     | 3     | 4     | 5     | 6      | 7     | 8      | mean  | sd   | 1     | 2      | 3      | 4     | 5      | 6     | 7     | 8     | 9     | 10    | 11    | 12    | 13    | mean  | sd    | 1      |
|--------------------------------|--------|-------|-------|-------|-------|--------|-------|--------|-------|------|-------|--------|--------|-------|--------|-------|-------|-------|-------|-------|-------|-------|-------|-------|-------|--------|
| SiO <sub>2</sub>               | 50.44  | 48.76 | 49.59 | 50.97 | 49.42 | 50.72  | 53.01 | 53.96  | 50.86 | 1.79 | 58.14 | 58.59  | 55.46  | 56.92 | 58.82  | 56.81 | 56.3  | 59.24 | 59.36 | 59.24 | 59.04 | 60.6  | 59.36 | 58.3  | 1.48  | 62.55  |
| TiO <sub>2</sub>               | 1.21   | 1.27  | 1.39  | 1.09  | 1.19  | 1.16   | 0.88  | 0.99   | 1.15  | 0.16 | 0.5   | 0.67   | 0.76   | 0.84  | 0.72   | 0.69  | 0.66  | 0.54  | 0.65  | 0.51  | 0.67  | 0.42  | 0.51  | 0.63  | 0.12  | 0.6    |
| Al <sub>2</sub> O <sub>3</sub> | 18.26  | 18.26 | 18.34 | 18.8  | 18.51 | 18.28  | 18.88 | 19.09  | 18.55 | 0.33 | 19.63 | 19.59  | 19.46  | 19.53 | 19.65  | 19.75 | 19.52 | 19.92 | 20    | 19.79 | 19.88 | 20.05 | 19.95 | 19.75 | 0.2   | 18.22  |
| FeO                            | 8.93   | 9.79  | 9.17  | 7.82  | 9.09  | 8.73   | 7.04  | 6.05   | 8.33  | 1.26 | 3.67  | 3.64   | 5.12   | 4.33  | 3.26   | 4.64  | 5.13  | 3.07  | 2.88  | 2.9   | 2.91  | 2.66  | 2.91  | 3.62  | 0.89  | 2.75   |
| MnO                            | 0.19   | 0.34  | 0.25  | 0.16  | 0.24  | 0.23   | 0.15  | 0.16   | 0.22  | 0.04 | 0.09  | 0.24   | 0.2    | 0.15  | 0.27   | 0.11  | 0.06  | 0.16  | 0.24  | 0.12  | 0.16  | 0     | 0.19  | 0.15  | 0.08  | 0.18   |
| MgO                            | 3.32   | 3.78  | 3.75  | 3.98  | 3.72  | 3.21   | 2.5   | 3.19   | 0.59  | 0.62 | 0.63  | 1.57   | 1.36   | 0.59  | 1.36   | 0.59  | 1.36  | 0.4   | 0.49  | 0.52  | 0.62  | 0.39  | 0.46  | 0.82  | 0.43  | 0.49   |
| CaO                            | 9.23   | 9.24  | 9.49  | 8.21  | 9.51  | 8.44   | 7.31  | 6.34   | 8.47  | 1.15 | 3.58  | 3.62   | 5.41   | 4.15  | 3.02   | 4.45  | 5.09  | 2.5   | 2.55  | 2.29  | 2.59  | 2.52  | 2.51  | 3.41  | 1.07  | 0.97   |
| Na <sub>2</sub> O              | 2.95   | 2.92  | 2.76  | 3.46  | 2.9   | 3.37   | 3.94  | 3.83   | 3.27  | 0.45 | 4.74  | 4.22   | 4.13   | 4.48  | 4.77   | 4.38  | 4.06  | 4.91  | 4.61  | 4.96  | 4.77  | 4.27  | 4.77  | 4.54  | 0.31  | 7.26   |
| K <sub>2</sub> O               | 4.89   | 4.9   | 4.67  | 5.77  | 4.76  | 5.32   | 5.87  | 6.98   | 5.4   | 0.78 | 8.35  | 8.3    | 7.42   | 7.85  | 8.52   | 7.43  | 7.48  | 8.74  | 8.82  | 9.22  | 8.96  | 8.68  | 8.91  | 8.36  | 0.62  | 6.43   |
| P <sub>2</sub> O <sub>5</sub>  | 0.32   | 0.47  | 0.27  | 0.34  | 0.43  | 0.22   | 0.12  | 0.07   | 0.28  | 0.14 | 0     | 0      | 0.08   | 0     | 0      | 0     | 0     | 0.07  | 0     | 0     | 0     | 0     | 0     | 0.01  | 0.03  | 0      |
| ClO                            | 0.27   | 0.26  | 0.27  | 0.29  | 0.22  | 0.33   | 0.3   | 0.35   | 0.29  | 0.04 | 0.37  | 0.51   | 0.4    | 0.36  | 0.39   | 0.38  | 0.3   | 0.5   | 0.38  | 0.39  | 0.4   | 0.41  | 0.42  | 0.4   | 0.05  | 0.56   |
|                                | 100.01 | 99.99 | 99.95 | 99.99 | 99.99 | 100.01 | 100   | 100.01 | 99.99 | 0.04 | 99.99 | 100.01 | 100.01 | 99.99 | 100.01 | 99.99 | 99.99 | 99.98 | 99.96 | 99.94 | 100   | 100   | 99.99 | 99.99 | 99.99 | 100.01 |
| tot alkali                     | 7.84   | 7.82  | 7.43  | 9.23  | 7.66  | 8.69   | 9.81  | 10.81  | 8.66  | 1.2  | 13.09 | 12.52  | 11.55  | 12.33 | 13.29  | 11.81 | 11.54 | 13.65 | 13.43 | 14.18 | 13.73 | 12.95 | 13.68 | 12.79 | 0.88  | 13.69  |
| alkali ratio                   | 1.66   | 1.68  | 1.69  | 1.67  | 1.64  | 1.58   | 1.49  | 1.82   | 1.65  | 0.1  | 1.76  | 1.97   | 1.8    | 1.75  | 1.79   | 1.7   | 1.84  | 1.78  | 1.91  | 1.86  | 1.88  | 1.83  | 1.87  | 1.84  | 0.09  | 0.89   |
